# Supplementary material for: A Reversible Phase Transition of 2D Coordination Layers by B–H∙∙∙Cu(II) Interactions in a Coordination Polymer
Source: MDPI journal article supplement (doi:10.3390/molecules24173204), 2019-09-03
Supplement: s1 [file s1]

## Supplementary Information

# A Reversible Phase Transition of 2D Coordination Layers by B–H...Cu(II) Interactions in a Coordination Polymer

Lei Gan <sup>1</sup>, Pol G. Fonquernie <sup>1</sup>, Mark E. Light <sup>2</sup>, Gantulga Norjmaa <sup>3</sup>, Gregori Ujaque <sup>3</sup>, Duane Choquesillo-Lazarte <sup>4</sup>, Julio Fraile <sup>1</sup>, Francesc Teixidor <sup>1</sup>, Clara Viñas <sup>1</sup>, and José G. Planas <sup>1,\*</sup>

<sup>1</sup> Institut de Ciència de Materials de Barcelona (ICMAB-CSIC), Bellaterra 08193, Spain

<sup>2</sup> Department of Chemistry, University of Southampton, Highfield, Southampton SO17 1BJ, UK.

<sup>3</sup> Departament de Química, Universitat Autònoma de Barcelona, 08193 Cerdanyola del Valles, Catalonia, Spain

<sup>4</sup> Laboratorio de Estudios Cristalográficos, IACT, CSIC-Universidad de Granada, Av. de las Palmeras 4, E-18100 Armilla, Granada, Spain

\* Correspondence: jginerplanas@icmab.es

Academic editors: Igor B. Sivaev, Narayan S. Hosmane and Bohumír Grůner

Received: 19 July 2019; Accepted: 01 September 2019; Published: date

| <b>Table S1.</b> Crystal and Structure Refinement data for <b>1-Solv</b> (Solv = <b>DMA</b> , <b>DMF</b> or <b>MeOH</b> ). |                                                                                                   |                                                                                                   |                                                                                    |
|----------------------------------------------------------------------------------------------------------------------------|---------------------------------------------------------------------------------------------------|---------------------------------------------------------------------------------------------------|------------------------------------------------------------------------------------|
| Compound                                                                                                                   | <b>1-DMA</b>                                                                                      | <b>1-DMF</b>                                                                                      | <b>1-MeOH</b>                                                                      |
| Empirical formula                                                                                                          | C <sub>48</sub> H <sub>72</sub> B <sub>20</sub><br>N <sub>4</sub> O <sub>12</sub> Cu <sub>2</sub> | C <sub>44</sub> H <sub>64</sub> B <sub>20</sub><br>N <sub>4</sub> O <sub>12</sub> Cu <sub>2</sub> | C <sub>38</sub> H <sub>60</sub> B <sub>20</sub><br>O <sub>14</sub> Cu <sub>2</sub> |
| Formula weight                                                                                                             | 1240.37                                                                                           | 1184.27                                                                                           | 1084.14                                                                            |
| Crystal system                                                                                                             | Triclinic                                                                                         | Triclinic                                                                                         | Monoclinic                                                                         |
| Space group                                                                                                                | P-1                                                                                               | P-1                                                                                               | P21/c                                                                              |
| CCDC ref                                                                                                                   | 1901504                                                                                           | 1899491                                                                                           | 1859468                                                                            |
| Wavelength (Å)                                                                                                             | Cu Kα (1.5418)                                                                                    | Mo Kα (0.71073)                                                                                   | Mo Kα (0.71073)                                                                    |
| a (Å)                                                                                                                      | 15.2205(5)                                                                                        | 14.4079(13)                                                                                       | 16.2198(5)                                                                         |
| b (Å)                                                                                                                      | 15.5001(6)                                                                                        | 14.5172(12)                                                                                       | 12.5200(3)                                                                         |
| c (Å)                                                                                                                      | 15.5639(5)                                                                                        | 15.4994(11)                                                                                       | 14.1322(5)                                                                         |
| α (deg)                                                                                                                    | 82.435(2)                                                                                         | 86.242(6)                                                                                         | 90                                                                                 |
| β (deg)                                                                                                                    | 87.787(2)                                                                                         | 89.578(7)                                                                                         | 113.426(4)                                                                         |
| γ(deg)                                                                                                                     | 63.755(2)                                                                                         | 63.842(8)                                                                                         | 90                                                                                 |
| V (Å <sup>3</sup> )                                                                                                        | 5897(2)                                                                                           | 2901.8(4)                                                                                         | 2633.30(16)                                                                        |
| Z                                                                                                                          | 2                                                                                                 | 2                                                                                                 | 2                                                                                  |
| F (000)                                                                                                                    | 1284                                                                                              | 1220.0                                                                                            | 1116.0                                                                             |
| θ (range)                                                                                                                  | 2.865 - 67.266                                                                                    | 3.735 - 25.027                                                                                    | 2.126-28.499                                                                       |
| Max./min. transmission                                                                                                     | 0.752817/ 0.615490                                                                                | 1.000000/0.59033                                                                                  | 1.000/0.798                                                                        |
| Ind refln<br>(R <sub>int</sub> )                                                                                           | 11538<br>(-)                                                                                      | 10188<br>(-)                                                                                      | 5966<br>(0.0714)                                                                   |
| R1 (I > 2(I))                                                                                                              | 0.0469                                                                                            | 0.0863                                                                                            | 0.0455                                                                             |
| R1 (all data)                                                                                                              | 0.0604                                                                                            | 0.1603                                                                                            | 0.0576                                                                             |
| wR2                                                                                                                        | 0.1122                                                                                            | 0.1718                                                                                            | 0.1220                                                                             |
| Wr2 (all data)                                                                                                             | 0.1191                                                                                            | 0.2062                                                                                            | 0.1268                                                                             |

| <b>Table S2.</b> Selected distances (Å) and angles (°) for <b>1-Solv</b> (Solv = <b>DMA</b> , <b>DMF</b> or <b>MeOH</b> ). |           |                     |                      |                                                                       |                    |
|----------------------------------------------------------------------------------------------------------------------------|-----------|---------------------|----------------------|-----------------------------------------------------------------------|--------------------|
| Compound                                                                                                                   | Cu–Cu     | Cu–O <sub>2</sub> C | Cu–O <sub>solv</sub> | O <sub>2</sub> C–CB <sub>centroid</sub> –CO <sub>2</sub> <sup>a</sup> | Ph–Ph <sup>b</sup> |
| <b>1-DMA</b>                                                                                                               | 2.643     | 1.952               | 2.081                | 112.62                                                                | 86.76              |
|                                                                                                                            | 2.647     | 1.959               | 2.124                | 115.43                                                                | 86.45              |
|                                                                                                                            |           | 1.961               |                      |                                                                       |                    |
|                                                                                                                            |           | 1.962               |                      |                                                                       |                    |
|                                                                                                                            |           | 1.964               |                      |                                                                       |                    |
|                                                                                                                            |           | 1.965               |                      |                                                                       |                    |
|                                                                                                                            |           | 1.977               |                      |                                                                       |                    |
|                                                                                                                            |           | 1.983               |                      |                                                                       |                    |
| <b>1-DMF</b>                                                                                                               | 2.607(2)  | 1.941(4)            | 2.111(5)             | 110.54                                                                | 82.21              |
|                                                                                                                            | 2.641(2)  | 1.948(4)            | 2.138(4)             | 114.98                                                                | 77.7(2)            |
|                                                                                                                            |           | 1.959(5)            |                      |                                                                       |                    |
|                                                                                                                            |           | 1.966(4)            |                      |                                                                       |                    |
|                                                                                                                            |           | 1.972(4)            |                      |                                                                       |                    |
|                                                                                                                            |           | 1.974(4)            |                      |                                                                       |                    |
|                                                                                                                            |           | 1.981(5)            |                      |                                                                       |                    |
|                                                                                                                            |           | 1.991(4)            |                      |                                                                       |                    |
| <b>1-MeOH</b>                                                                                                              | 2.620(50) | 1.951(2)            | 2.130(2)             | 112.22                                                                | 87.29(30)          |
|                                                                                                                            |           | 1.958(2)            |                      |                                                                       |                    |
|                                                                                                                            |           | 1.962(2)            |                      |                                                                       |                    |
|                                                                                                                            |           | 1.983(2)            |                      |                                                                       |                    |

<sup>a</sup> Carboxylated Carbon to carborane centroid angle. <sup>b</sup> Angle between C<sub>6</sub>H<sub>4</sub> rings in the L<sub>CB</sub>(COO)<sub>2</sub> ligand.

Figure S1. FT-IR spectra of L1 ligand, 1-DMA, 1-DMF, 1'-MeOH-air and 1'-CH<sub>2</sub>Cl<sub>2</sub>-air.

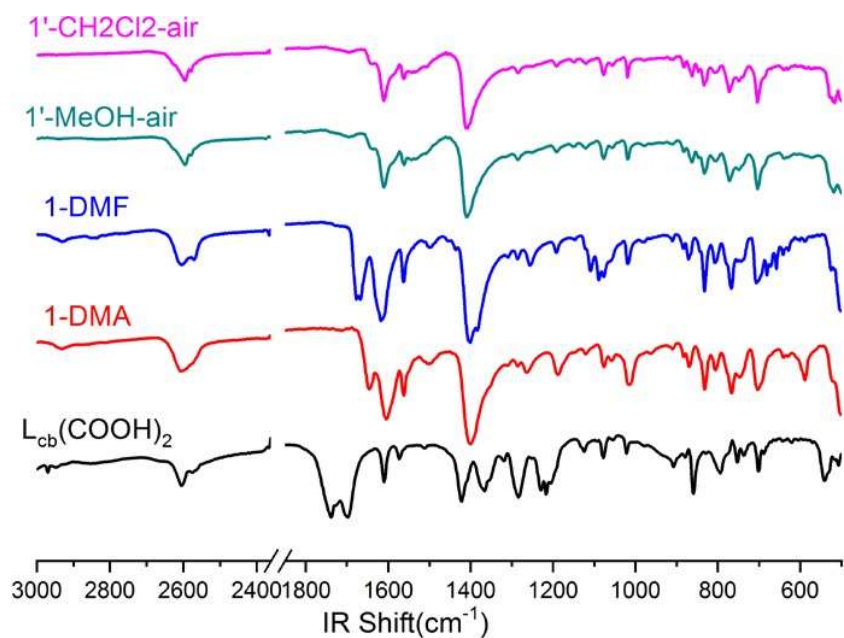

Figure S2. Comparison of calculated and experimental PXRD for 1-DMF and 1-DMA.

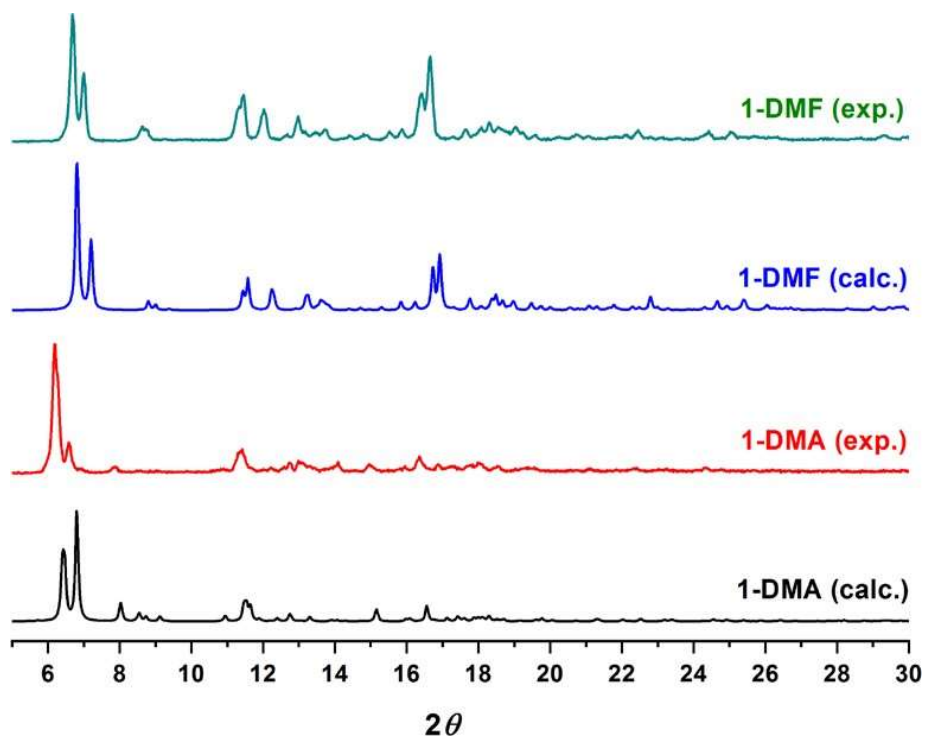

Figure S3. TGA diagram of as made 1-DMA (red) and 1-DMF (green).

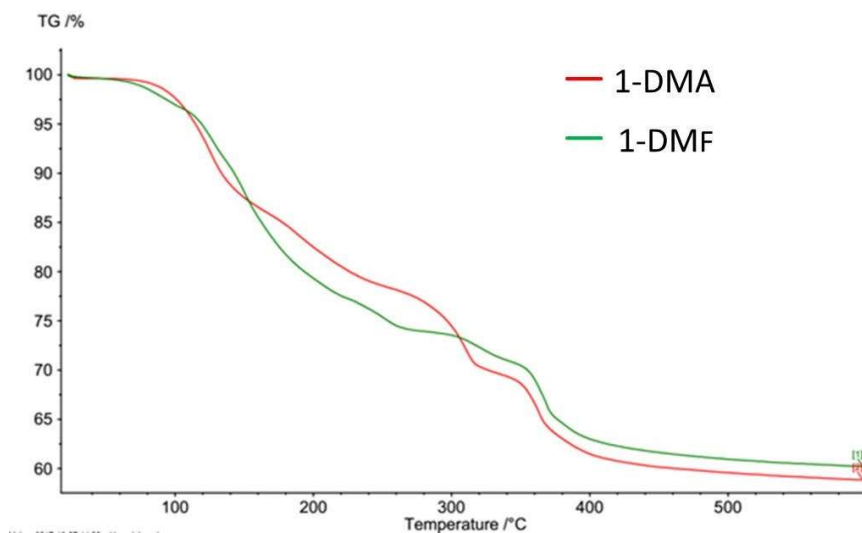

Figure S4. TGA diagrams of 1'-MeOH-air (black) and 1'-CH<sub>2</sub>Cl<sub>2</sub>-air (red).

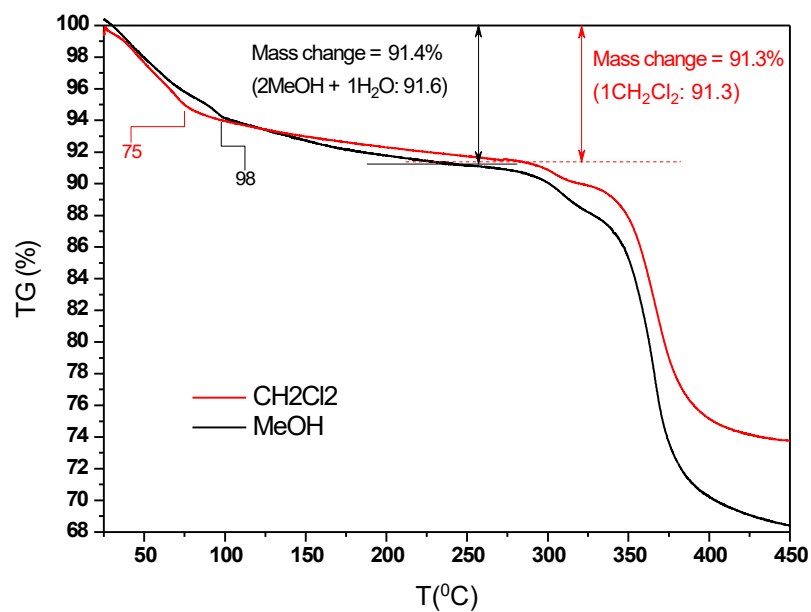

**Figure S5. PXRD comparison for MeOH related compounds.** (A) Calculated PXRD from structure **1-MeOH** (Figure 3). (B) PXRD of crystals obtained after exposing **1-MeOH** to air and dried on a filter paper. (C) PXRD of crystals obtained after immersing **1-DMF** into MeOH and then exposed to air and dried on a filter paper. The comparison reveals that **1-MeOH** is not stable out of solvent and rapidly transforms into **1'-MeOH-air**.

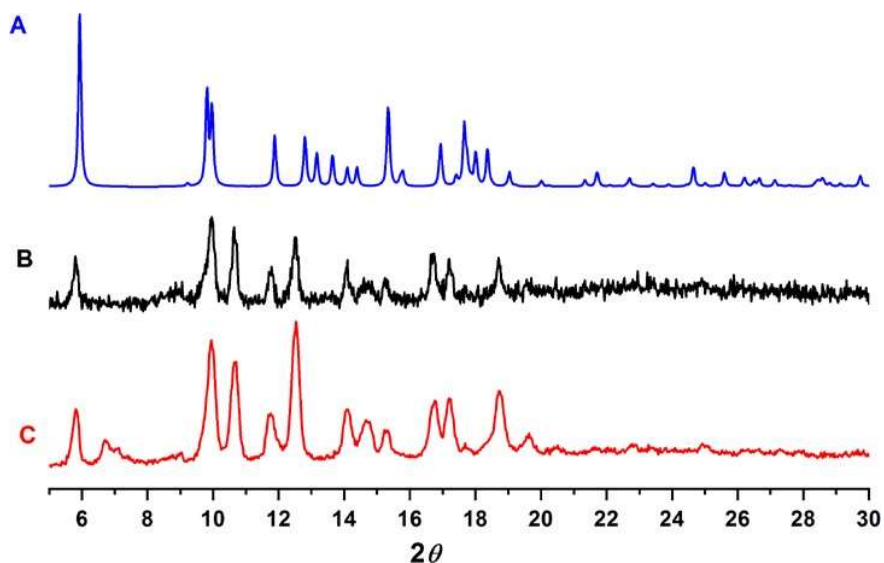

**Figure S6. PXRD patterns showing reversible transformation from different samples to 1-DMF.** Samples for **1'-MeOH-air**, **1'-CH<sub>2</sub>Cl<sub>2</sub>-air** or activated **1'-CH<sub>2</sub>Cl<sub>2</sub>-air** were immersed in DMF, as explained in the experimental section. The PXRD show the conversion in all cases.

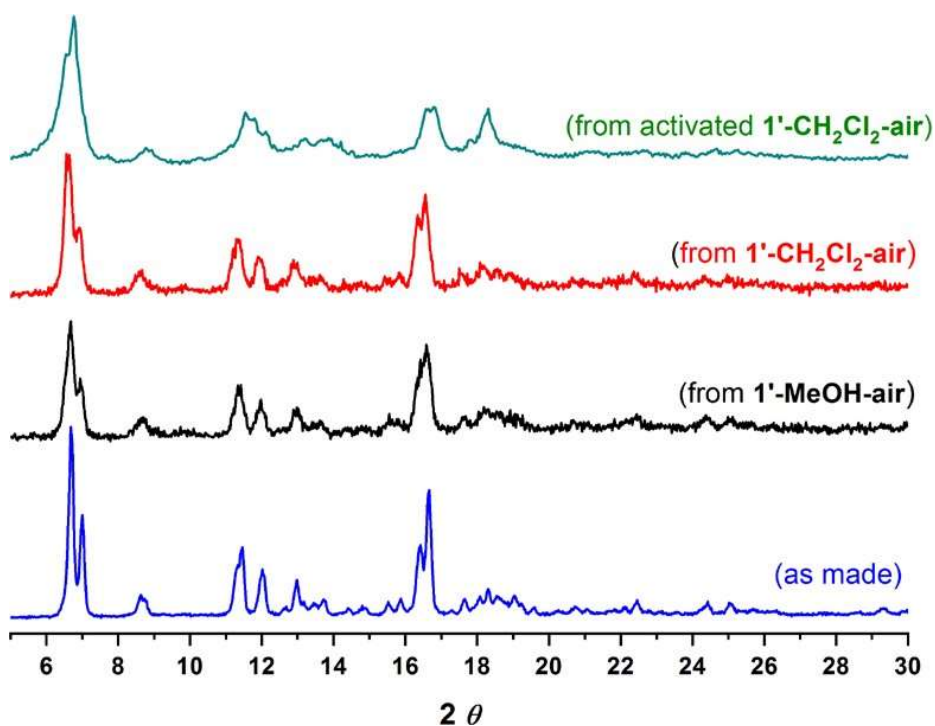

## Sorption Data

Figure S7. CO<sub>2</sub> adsorption isotherm at 273 K for activated 1'-activated.

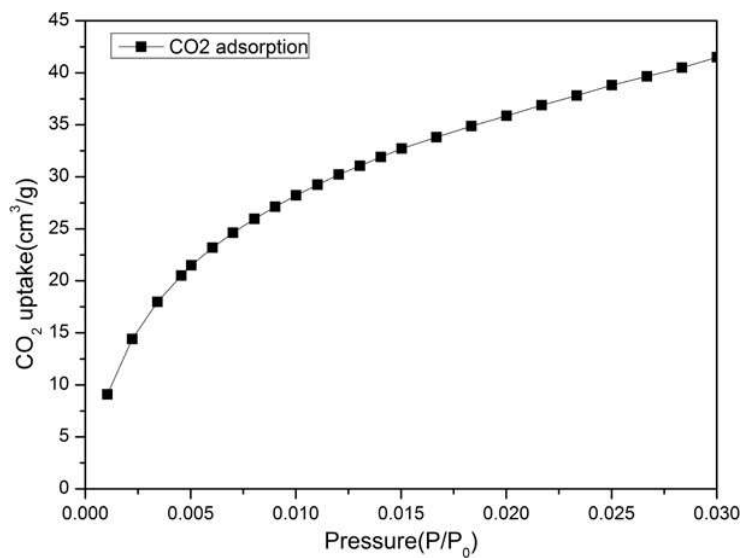

Figure S8. Pore Distribution by Density Functional Theory Model: CO<sub>2</sub>-DFT Slit Geometry for activated 1'-activated.

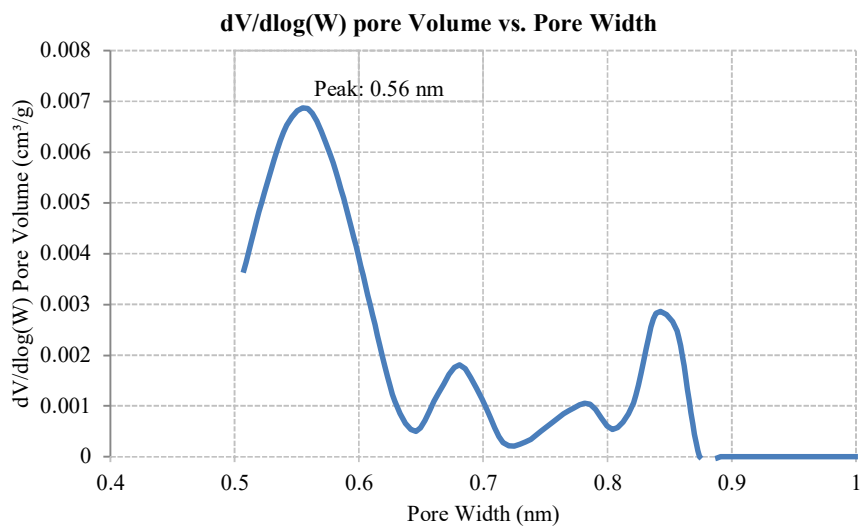

## Raman Spectra

**Figure S9. Comparison of Experimental Raman Spectra of 1-DMF, 1'-DCM-wet, 1'-DCM-air and 1'-MeOH-air.** The Raman spectra for all compounds show that resonances for the ligand region (400-1700  $\text{cm}^{-1}$ ) are nearly identical, even for the one measured in liquid phase (1'- $\text{CH}_2\text{Cl}_2$ -wet). The resonances for  $\text{CH}_2\text{Cl}_2$  are marked with red asterisks. The characteristic double band of  $\nu_{\text{sym}}(\text{COO}^-)$  vibration for the bridged carboxylates at around 1400 and 1420  $\text{cm}^{-1}$  remains unchanged, demonstrating that there is no change in the carboxylates coordination during the transformation. Major changes in the spectra are only observed in the Cu-Cu region (140-230  $\text{cm}^{-1}$ ; bottom left zoomed area) and in the B-H region (2500-2700  $\text{cm}^{-1}$ ; bottom right zoomed area).

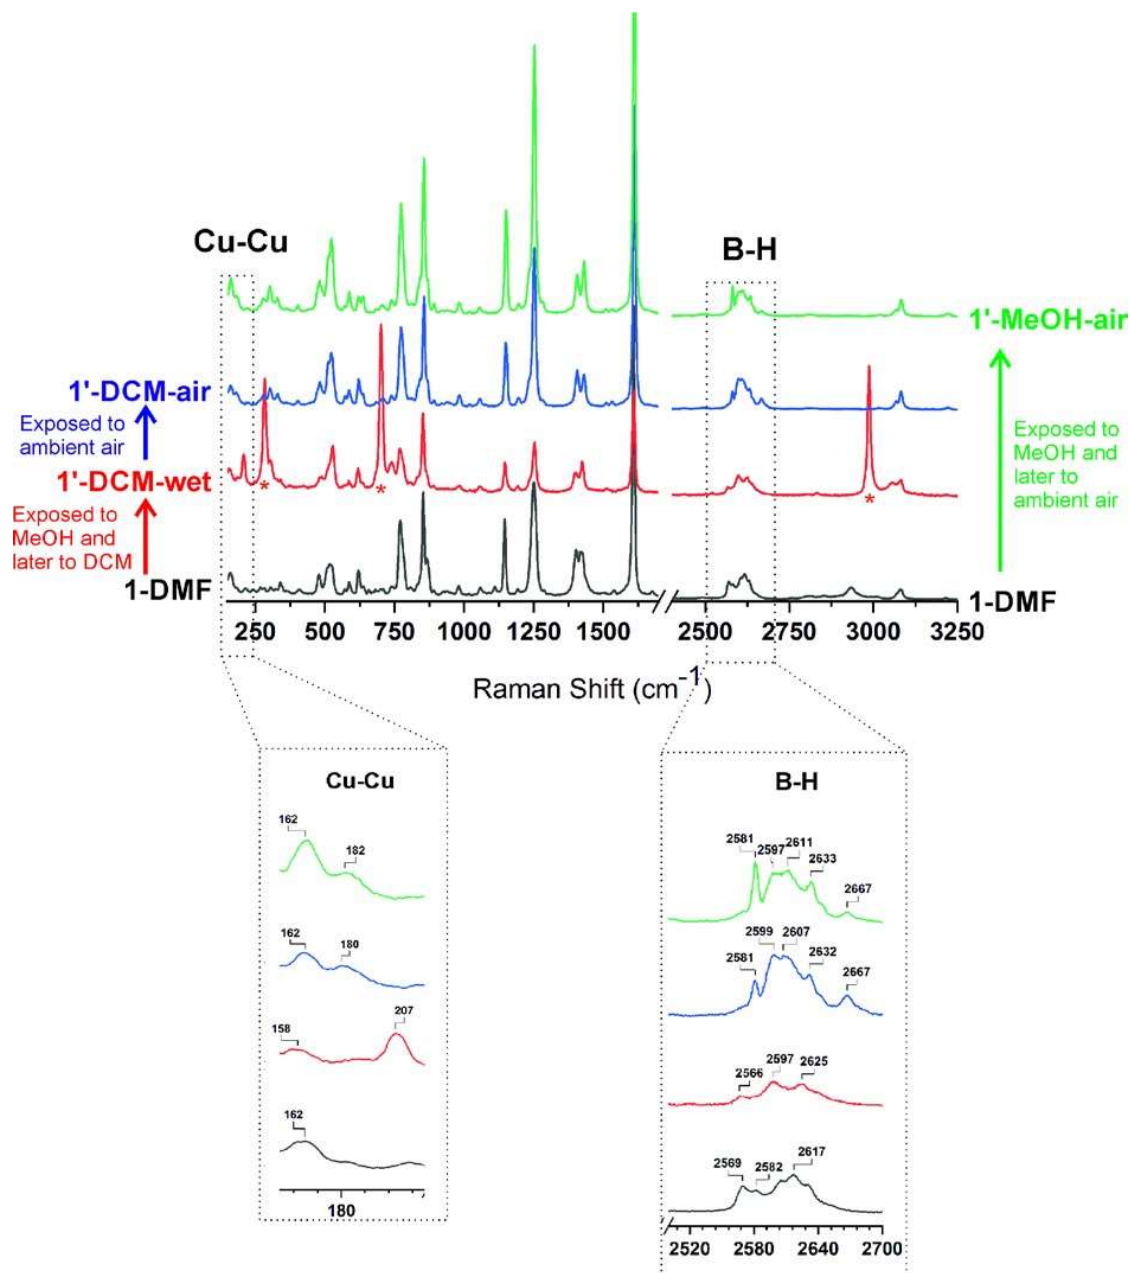



**Figure S10. Comparison of Experimental and Calculated Raman for 1-DMF with  $[\text{Cu}_2(\text{LCB})_4(\text{DMF})_2]$  (LCB = 1-(4-carboxyphenyl)-1,7-dicarba-*closo*-dodecaborane).** Note the remarkable agreement between the calculated and experimental Raman spectrum for 1-DMF. Nevertheless, as expected, predicted vibrational frequencies do not match exactly the experimental values.<sup>1</sup> Generally, an empirical scaling factor is applied to correct the shift and bring the values closer to the experimental ones. The figure shows the theoretically obtained spectra instead of the corrected one because our purpose here is the interpretation and assignment of the vibrational modes, not to match experimental values, as the model and the 1-DMF are essentially different. At any rate, the agreement is remarkable.

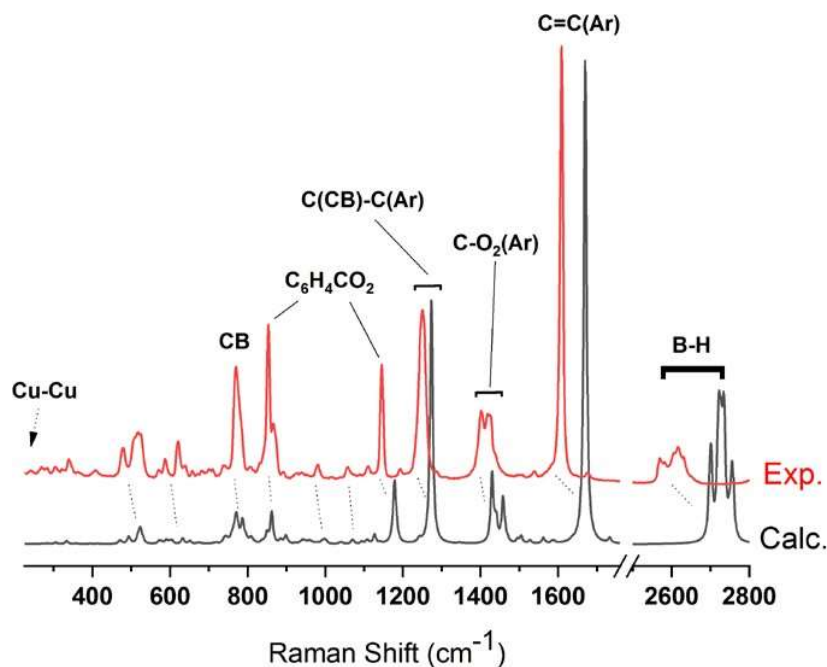

**Figure S11. Comparison of Experimental and Calculated Raman for 1'-CH<sub>2</sub>Cl<sub>2</sub>-air and 1'-MeOH-air with  $[\text{Cu}_2(\text{LCB})_4(\text{Solv})_2]$  (LCB = 1-(4-carboxyphenyl)-1,7-dicarba-*closo*-dodecaborane; Solv = H<sub>2</sub>O, *m*-C<sub>2</sub>B<sub>10</sub>H<sub>12</sub> and/or none (Open Metal Site)).** Note that calculated 1'(A)(B) Raman spectra at the bottom correspond to  $[\text{Cu}_2(\text{LCB})_4(\text{A})(\text{B})]$ , being A: *m*-C<sub>2</sub>B<sub>10</sub>H<sub>12</sub> or CB and B: H<sub>2</sub>O (violet), None (blue) or CB (green).

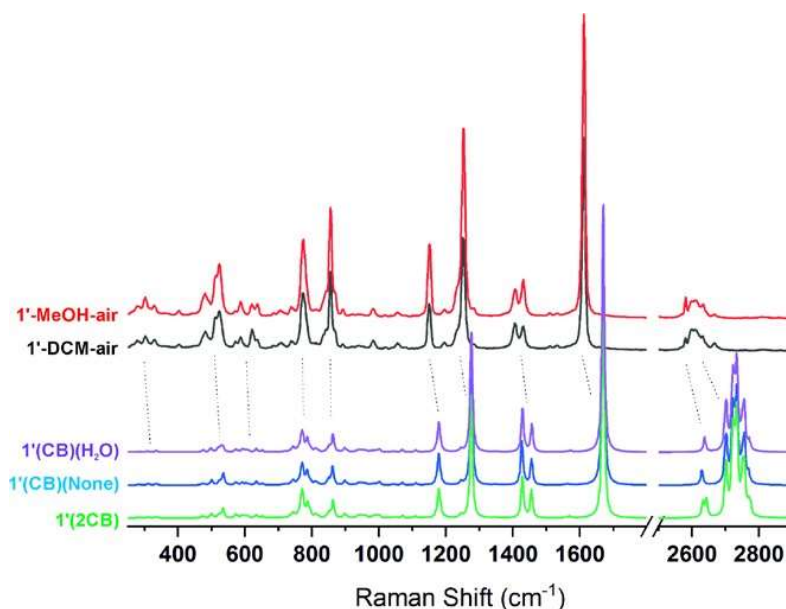

## Computational details.

```
*****
CuBiphenyl
*****

98
scf done: -3000.053667
Cu 0.000122 0.000037 1.249532
O -1.302016 -1.463159 -1.128126
O -1.463620 -1.301676 1.125822
C -4.845459 -4.844056 -0.001525
C -4.389015 -4.278965 1.203113
H -4.830821 -4.597144 2.142913
C -3.405753 -3.295986 1.205978
H -3.064347 -2.857257 2.137106
C -2.850599 -2.849680 -0.001289
C -3.296906 -3.404574 -1.208671
H -2.857974 -3.063183 -2.139710
C -4.280125 -4.387596 -1.206038
H -4.598314 -4.829204 -2.145929
C -1.796607 -1.795993 -0.001170
Cu 0.000101 -0.000119 -1.249461
O -1.301460 1.463540 1.128157
O 1.301722 -1.463460 1.127776
O 1.463880 1.301734 1.126273
O 1.302164 1.462955 -1.127685
O 1.463384 -1.302342 -1.126194
O -1.463240 1.302055 -1.125776
C 1.796788 1.795944 -0.000792
C 4.845285 4.844361 -0.001622
C 4.280056 4.387595 -1.206068
C 4.388851 4.279461 1.203109
H 4.598248 4.829040 -2.146035
C 3.296945 3.404467 -1.208547
H 2.858096 3.062839 -2.139538
C 2.850647 2.849763 -0.001074
C 3.405696 3.296375 1.206128
H 3.064300 2.857795 2.137330
H 4.830579 4.597877 2.142866
C 1.796238 -1.796580 0.000872
C 2.850254 -2.850242 0.001153
C 3.405332 -3.296766 -1.206064
C 3.296702 -3.404855 1.208616
H 3.063823 -2.858245 -2.137254
C 4.388671 -4.279665 -1.203079
H 4.830410 -4.598019 -2.142852
C 4.845290 -4.844446 0.001635
C 4.280004 -4.387795 1.206105
H 4.598288 -4.829192 2.146061
H 2.857834 -3.063295 2.139622
C -1.796065 1.796449 0.001224
C -2.850129 2.850064 0.001391
C -3.296471 3.404924 1.208780
C -3.405356 3.296297 -1.205866
H -2.857496 3.063583 2.139816
C -4.279809 4.387829 1.206155
H -4.598025 4.829413 2.146047
C -4.845236 4.844192 0.001645
```

|   |           |           |           |
|---|-----------|-----------|-----------|
| C | -4.388736 | 4.279155  | -1.202992 |
| H | -4.830588 | 4.597287  | -2.142788 |
| H | -3.063928 | 2.857586  | -2.136996 |
| C | -5.894336 | -5.892653 | -0.001672 |
| C | -6.893491 | -5.912146 | -0.990004 |
| C | -5.914236 | -6.891994 | 0.986467  |
| C | -7.879983 | -6.897443 | -0.989806 |
| H | -6.910483 | -5.132598 | -1.746477 |
| C | -6.899767 | -7.878255 | 0.985899  |
| H | -5.134811 | -6.909331 | 1.743057  |
| C | -7.887156 | -7.885010 | -0.002045 |
| H | -8.648933 | -6.888917 | -1.757745 |
| H | -6.891554 | -8.647360 | 1.753686  |
| H | -8.655574 | -8.653251 | -0.002190 |
| C | 5.894243  | -5.892967 | 0.001870  |
| C | 6.893552  | -5.912195 | 0.990057  |
| C | 5.914131  | -6.892438 | -0.986135 |
| C | 7.880153  | -6.897385 | 0.989860  |
| H | 6.910602  | -5.132509 | 1.746384  |
| C | 6.899770  | -7.878589 | -0.985564 |
| H | 5.134623  | -6.909947 | -1.742637 |
| C | 7.887293  | -7.885099 | 0.002245  |
| H | 8.649224  | -6.888649 | 1.757677  |
| H | 6.891543  | -8.647794 | -1.753252 |
| H | 8.655798  | -8.653252 | 0.002385  |
| C | 5.894059  | 5.893058  | -0.001942 |
| C | 5.913857  | 6.892579  | 0.986017  |
| C | 6.893212  | 5.912475  | -0.990276 |
| C | 6.899296  | 7.878932  | 0.985280  |
| H | 5.134427  | 6.909978  | 1.742601  |
| C | 7.879609  | 6.897867  | -0.990250 |
| H | 6.910275  | 5.132802  | -1.746619 |
| C | 7.886690  | 7.885606  | -0.002661 |
| H | 6.891006  | 8.648170  | 1.752933  |
| H | 8.648557  | 6.889280  | -1.758190 |
| H | 8.655035  | 8.653920  | -0.002939 |
| C | -5.894226 | 5.892671  | 0.001765  |
| C | -5.914265 | 6.891918  | -0.986462 |
| C | -6.893406 | 5.912091  | 0.990076  |
| C | -6.899937 | 7.878036  | -0.985994 |
| H | -5.134856 | 6.909275  | -1.743070 |
| C | -7.880038 | 6.897249  | 0.989780  |
| H | -6.910317 | 5.132586  | 1.746593  |
| C | -7.887337 | 7.884737  | 0.001938  |
| H | -6.891833 | 8.647064  | -1.753860 |
| H | -8.649006 | 6.888668  | 1.757701  |
| H | -8.655866 | 8.652867  | 0.002002  |

\*\*\*\*\*

CuBiphenyl\_MeOH

\*\*\*\*\*

110

scf done: -3231.544026

|    |           |           |           |
|----|-----------|-----------|-----------|
| Cu | 0.007802  | 0.003345  | -1.295103 |
| O  | -1.654136 | -1.116102 | 1.100329  |
| O  | -1.424517 | -1.385594 | -1.132303 |
| O  | -0.359359 | -0.243024 | -3.497738 |
| H  | -1.328674 | -0.276566 | -3.427309 |
| C  | -5.319095 | -4.368737 | -0.014350 |
| C  | -4.655884 | -4.038847 | -1.210009 |
| H  | -4.969392 | -4.504862 | -2.139829 |
| C  | -3.584408 | -3.152503 | -1.212463 |

|    |           |           |           |
|----|-----------|-----------|-----------|
| H  | -3.069790 | -2.910865 | -2.136128 |
| C  | -3.143532 | -2.570213 | -0.016834 |
| C  | -3.795589 | -2.892400 | 1.180946  |
| H  | -3.455247 | -2.433529 | 2.102835  |
| C  | -4.867636 | -3.778431 | 1.179749  |
| H  | -5.381522 | -3.998765 | 2.111048  |
| C  | -1.989643 | -1.620360 | -0.015278 |
| C  | 0.105139  | -1.535761 | -3.927368 |
| H  | -0.221774 | -2.315370 | -3.232142 |
| H  | 1.194226  | -1.484562 | -3.913183 |
| H  | -0.240720 | -1.752820 | -4.945257 |
| Cu | -0.030201 | -0.000439 | 1.291780  |
| O  | 1.384793  | -1.414672 | -1.073164 |
| O  | -1.396512 | 1.399750  | -1.110832 |
| O  | 1.408861  | 1.377151  | -1.169307 |
| O  | 1.634225  | 1.110464  | 1.064241  |
| O  | 0.370020  | 0.076313  | 3.483550  |
| O  | -1.130173 | 1.629201  | 1.124901  |
| O  | 1.111382  | -1.618135 | 1.164184  |
| C  | 1.969306  | 1.616146  | -0.053669 |
| H  | 1.274291  | -0.279767 | 3.453573  |
| C  | 0.418423  | 1.435323  | 3.954743  |
| C  | 5.278571  | 4.389074  | -0.076097 |
| C  | 4.849562  | 3.786989  | 1.120455  |
| C  | 4.601170  | 4.060984  | -1.264201 |
| H  | 5.375824  | 4.004467  | 2.045568  |
| C  | 3.784419  | 2.892890  | 1.129374  |
| H  | 3.465462  | 2.423140  | 2.053519  |
| C  | 3.117321  | 2.573266  | -0.060507 |
| C  | 3.537130  | 3.165437  | -1.259173 |
| H  | 3.011287  | 2.922814  | -2.176167 |
| H  | 4.897756  | 4.535104  | -2.195409 |
| H  | 1.054281  | 2.047082  | 3.307191  |
| H  | -0.604869 | 1.807759  | 3.898415  |
| H  | 0.768692  | 1.472785  | 4.993195  |
| C  | -1.640844 | 1.956961  | 0.005447  |
| C  | -2.610957 | 3.093022  | 0.005382  |
| C  | -3.040927 | 3.659690  | 1.212533  |
| C  | -3.105701 | 3.601443  | -1.202958 |
| H  | -2.650028 | 3.267858  | 2.145202  |
| C  | -3.949720 | 4.712352  | 1.209889  |
| H  | -4.256550 | 5.158401  | 2.151632  |
| C  | -4.453198 | 5.231284  | 0.003446  |
| C  | -4.012457 | 4.655794  | -1.201914 |
| H  | -4.407427 | 5.023924  | -2.144476 |
| H  | -2.775274 | 3.155379  | -2.134677 |
| C  | 1.626354  | -1.957366 | 0.050765  |
| C  | 2.600309  | -3.091025 | 0.064557  |
| C  | 3.282430  | -3.452844 | -1.104746 |
| C  | 2.845049  | -3.803160 | 1.246209  |
| H  | 3.084356  | -2.903936 | -2.018904 |
| C  | 4.194489  | -4.502530 | -1.089681 |
| H  | 4.700121  | -4.787146 | -2.008011 |
| C  | 4.448297  | -5.224618 | 0.090349  |
| C  | 3.754202  | -4.855621 | 1.256618  |
| H  | 3.952286  | -5.384000 | 2.184835  |
| H  | 2.318380  | -3.517389 | 2.150268  |
| C  | -6.461966 | -5.314182 | -0.013770 |
| C  | -6.620891 | -6.253230 | 1.019785  |
| C  | -7.413781 | -5.294204 | -1.047766 |
| C  | -7.694392 | -7.143107 | 1.018653  |
| H  | -5.881523 | -6.301162 | 1.814369  |
| C  | -8.488049 | -6.183017 | -1.048531 |

|   |           |           |           |
|---|-----------|-----------|-----------|
| H | -7.323436 | -4.557863 | -1.841552 |
| C | -8.632822 | -7.111816 | -0.015471 |
| H | -7.793408 | -7.867384 | 1.822900  |
| H | -9.217733 | -6.144484 | -1.853080 |
| H | -9.469645 | -7.804961 | -0.016038 |
| C | -5.422433 | 6.354113  | 0.001655  |
| C | -5.346371 | 7.369541  | -0.967235 |
| C | -6.440947 | 6.430066  | 0.967260  |
| C | -6.257717 | 8.424728  | -0.970868 |
| H | -4.549936 | 7.343364  | -1.705685 |
| C | -7.352982 | 7.484807  | 0.963441  |
| H | -6.532651 | 5.640845  | 1.708245  |
| C | -7.265415 | 8.486882  | -0.005670 |
| H | -6.175436 | 9.204048  | -1.723934 |
| H | -8.138533 | 7.519216  | 1.713736  |
| H | -7.976108 | 9.308857  | -0.008548 |
| C | 6.413799  | 5.343652  | -0.085001 |
| C | 7.351012  | 5.338173  | -1.132428 |
| C | 6.580065  | 6.276969  | 0.952577  |
| C | 8.418215  | 6.235402  | -1.142108 |
| H | 7.254735  | 4.607029  | -1.930260 |
| C | 7.646520  | 7.175235  | 0.942600  |
| H | 5.851252  | 6.314239  | 1.757466  |
| C | 8.570506  | 7.158214  | -0.104759 |
| H | 9.136449  | 6.208326  | -1.957346 |
| H | 7.751061  | 7.895103  | 1.750117  |
| H | 9.401725  | 7.858028  | -0.112463 |
| C | 5.422117  | -6.343334 | 0.104631  |
| C | 5.168033  | -7.510847 | 0.844751  |
| C | 6.623270  | -6.262348 | -0.620698 |
| C | 6.083944  | -8.562041 | 0.859009  |
| H | 4.233117  | -7.603248 | 1.390413  |
| C | 7.539927  | -7.312894 | -0.605642 |
| H | 6.849703  | -5.357384 | -1.177633 |
| C | 7.274181  | -8.467471 | 0.134157  |
| H | 5.863780  | -9.459684 | 1.430804  |
| H | 8.467008  | -7.225954 | -1.166136 |
| H | 7.988351  | -9.286340 | 0.145580  |

\*\*\*\*\*

CuBiphenyl\_DMF

\*\*\*\*\*

122

scf done: -3497.143798

|   |           |           |           |
|---|-----------|-----------|-----------|
| C | -1.920178 | 1.709646  | -0.260060 |
| C | -3.031426 | 2.706057  | -0.365129 |
| C | -3.407067 | 3.219885  | -1.612999 |
| H | -2.869790 | 2.893171  | -2.496776 |
| C | -4.444949 | 4.141259  | -1.708538 |
| H | -4.710534 | 4.550851  | -2.679006 |
| C | -5.133762 | 4.578189  | -0.562934 |
| C | -4.744732 | 4.058167  | 0.684621  |
| H | -5.278327 | 4.365402  | 1.579813  |
| C | -3.710100 | 3.133899  | 0.783272  |
| H | -3.416212 | 2.729306  | 1.745913  |
| C | -1.751256 | -1.852874 | -0.130940 |
| C | -2.792597 | -2.928515 | -0.164425 |
| C | -3.455057 | -3.237420 | -1.359419 |
| H | -3.186795 | -2.696903 | -2.260722 |
| C | -4.433304 | -4.226352 | -1.384185 |
| H | -4.923907 | -4.472055 | -2.321847 |
| C | -4.773328 | -4.938670 | -0.220244 |

|    |           |           |           |
|----|-----------|-----------|-----------|
| C  | -4.097516 | -4.623602 | 0.972303  |
| H  | -4.359655 | -5.146937 | 1.887728  |
| C  | -3.123128 | -3.631231 | 1.001804  |
| H  | -2.606898 | -3.387119 | 1.924271  |
| C  | -3.990629 | -0.428511 | 4.863427  |
| H  | -4.379222 | -0.694778 | 3.877064  |
| H  | -4.553241 | 0.434239  | 5.242037  |
| H  | -4.152130 | -1.273634 | 5.544612  |
| C  | -1.882811 | 0.260715  | 5.991244  |
| H  | -1.930561 | -0.558016 | 6.719849  |
| H  | -2.348607 | 1.150553  | 6.432264  |
| H  | -0.841478 | 0.474951  | 5.750725  |
| C  | -1.924320 | -0.167290 | 3.586458  |
| H  | -2.550675 | -0.458581 | 2.734360  |
| Cu | -0.119434 | 0.056110  | 1.308426  |
| N  | -2.575387 | -0.113515 | 4.766757  |
| O  | -1.731682 | 1.171623  | 0.875963  |
| O  | -1.251930 | 1.475407  | -1.314891 |
| O  | -1.253763 | -1.569345 | 1.004186  |
| O  | -1.452987 | -1.302878 | -1.235333 |
| O  | -0.720741 | 0.080804  | 3.438340  |
| Cu | 0.044409  | -0.012790 | -1.333990 |
| O  | 1.510008  | -1.075212 | 1.322149  |
| O  | 1.024366  | 1.663909  | 1.156546  |
| C  | 1.873302  | -1.640924 | 0.245598  |
| C  | 3.064503  | -2.546257 | 0.308744  |
| O  | 1.325367  | -1.500142 | -0.891247 |
| C  | 3.749017  | -2.741987 | 1.514409  |
| C  | 3.521221  | -3.190271 | -0.849233 |
| H  | 3.385226  | -2.246978 | 2.408407  |
| C  | 4.871400  | -3.563381 | 1.558595  |
| H  | 5.378979  | -3.726988 | 2.505011  |
| C  | 5.341291  | -4.212478 | 0.402896  |
| C  | 4.642491  | -4.011474 | -0.801386 |
| H  | 5.001389  | -4.485984 | -1.710830 |
| H  | 2.986986  | -3.031193 | -1.779919 |
| C  | 1.668697  | 1.902044  | 0.089264  |
| C  | 2.676825  | 3.006233  | 0.133246  |
| O  | 1.536168  | 1.282914  | -1.014366 |
| C  | 3.009970  | 3.611422  | 1.351959  |
| C  | 3.301149  | 3.444627  | -1.041626 |
| H  | 2.513537  | 3.275199  | 2.255837  |
| C  | 3.954844  | 4.631435  | 1.393399  |
| H  | 4.187358  | 5.108659  | 2.341212  |
| C  | 4.589320  | 5.079370  | 0.220877  |
| C  | 4.242305  | 4.467880  | -0.997242 |
| H  | 4.735921  | 4.783683  | -1.912099 |
| H  | 3.039186  | 2.971799  | -1.982103 |
| C  | 4.040738  | -1.478340 | -4.224162 |
| H  | 4.450034  | -0.836269 | -3.440223 |
| H  | 4.288054  | -2.519359 | -3.980196 |
| H  | 4.516010  | -1.220967 | -5.178866 |
| N  | 2.600642  | -1.301377 | -4.304140 |
| C  | 1.874393  | -2.102937 | -5.278290 |
| H  | 2.203408  | -1.857769 | -6.295476 |
| H  | 2.055176  | -3.169755 | -5.097403 |
| H  | 0.809903  | -1.892252 | -5.175172 |
| C  | 1.946790  | -0.484849 | -3.452071 |
| H  | 2.595840  | 0.028745  | -2.731537 |
| O  | 0.720895  | -0.310382 | -3.445150 |
| C  | -5.815764 | -5.993697 | -0.249280 |
| C  | -5.658930 | -7.183430 | 0.482477  |
| C  | -6.986606 | -5.829383 | -1.009333 |

|   |           |           |           |
|---|-----------|-----------|-----------|
| C | -6.639092 | -8.174852 | 0.455196  |
| H | -4.748700 | -7.340723 | 1.054474  |
| C | -7.967402 | -6.820154 | -1.036224 |
| H | -7.137507 | -4.906151 | -1.561839 |
| C | -7.798044 | -7.997541 | -0.304027 |
| H | -6.493217 | -9.091212 | 1.021197  |
| H | -8.868923 | -6.668742 | -1.624135 |
| H | -8.561940 | -8.770073 | -0.325333 |
| C | 6.540514  | -5.084234 | 0.451275  |
| C | 6.595614  | -6.277442 | -0.289610 |
| C | 7.652376  | -4.738054 | 1.238397  |
| C | 7.723438  | -7.096191 | -0.245140 |
| H | 5.735601  | -6.577039 | -0.882160 |
| C | 8.780482  | -5.556405 | 1.283041  |
| H | 7.639457  | -3.807035 | 1.798236  |
| C | 8.821202  | -6.739212 | 0.541265  |
| H | 7.741077  | -8.019328 | -0.818603 |
| H | 9.632311  | -5.265268 | 1.892051  |
| H | 9.700090  | -7.377263 | 0.576225  |
| C | 5.597093  | 6.167031  | 0.267484  |
| C | 5.649525  | 7.146119  | -0.739607 |
| C | 6.525330  | 6.244862  | 1.320060  |
| C | 6.597581  | 8.167696  | -0.695962 |
| H | 4.923041  | 7.118662  | -1.546952 |
| C | 7.473883  | 7.265933  | 1.363844  |
| H | 6.517236  | 5.482782  | 2.094339  |
| C | 7.514342  | 8.232080  | 0.355915  |
| H | 6.614389  | 8.919807  | -1.480427 |
| H | 8.187855  | 7.302177  | 2.182561  |
| H | 8.253217  | 9.028154  | 0.390078  |
| C | -6.239631 | 5.561398  | -0.667054 |
| C | -6.394969 | 6.577303  | 0.291804  |
| C | -7.160107 | 5.501560  | -1.727608 |
| C | -7.434431 | 7.501573  | 0.193606  |
| H | -5.677828 | 6.657145  | 1.104085  |
| C | -8.200083 | 6.425195  | -1.825914 |
| H | -7.072446 | 4.708532  | -2.465084 |
| C | -8.342036 | 7.429539  | -0.865663 |
| H | -7.530134 | 8.284855  | 0.941074  |
| H | -8.905425 | 6.355322  | -2.649907 |
| H | -9.152088 | 8.149795  | -0.942396 |

\*\*\*\*\*

CuBiphenyl\_CB

\*\*\*\*\*

146

scf done: -3664.394958

|    |           |          |           |
|----|-----------|----------|-----------|
| Cu | 0.173609  | 0.257358 | -1.267291 |
| O  | 1.317477  | 1.318267 | 1.393931  |
| O  | 1.453048  | 1.671012 | -0.837665 |
| C  | 5.191641  | 4.496707 | 0.948769  |
| C  | 4.746308  | 4.167747 | -0.344453 |
| H  | 5.275409  | 4.562250 | -1.207326 |
| C  | 3.659884  | 3.321065 | -0.534189 |
| H  | 3.323046  | 3.064949 | -1.532678 |
| C  | 2.989497  | 2.776549 | 0.569779  |
| C  | 3.423389  | 3.094615 | 1.863389  |
| H  | 2.895505  | 2.675549 | 2.713272  |
| C  | 4.508834  | 3.944436 | 2.047658  |
| H  | 4.818194  | 4.207491 | 3.055081  |
| C  | 1.833469  | 1.856618 | 0.364331  |
| Cu | -0.297163 | 0.169984 | 1.239625  |

|   |           |           |           |
|---|-----------|-----------|-----------|
| O | -1.301783 | 1.585027  | -1.282579 |
| O | 1.535951  | -1.106340 | -0.781235 |
| O | -1.133729 | -1.173367 | -1.540140 |
| O | -1.801861 | -0.967742 | 0.611223  |
| O | 0.847198  | -1.413269 | 1.352039  |
| O | -1.418328 | 1.745153  | 0.973468  |
| C | -1.896281 | -1.454397 | -0.559504 |
| C | -5.080722 | -4.281222 | -1.240196 |
| C | -4.885075 | -3.702576 | 0.026981  |
| C | -4.208698 | -3.913016 | -2.280723 |
| H | -5.564021 | -3.951397 | 0.837742  |
| C | -3.857891 | -2.792065 | 0.247757  |
| H | -3.717497 | -2.342060 | 1.223810  |
| C | -2.996956 | -2.432636 | -0.798278 |
| C | -3.181398 | -3.000425 | -2.065667 |
| H | -2.507040 | -2.723875 | -2.868969 |
| H | -4.324808 | -4.367641 | -3.260336 |
| C | 1.582411  | -1.687200 | 0.348938  |
| C | 2.588531  | -2.776415 | 0.512463  |
| C | 2.710905  | -3.450495 | 1.734725  |
| C | 3.425696  | -3.129856 | -0.554493 |
| H | 2.056375  | -3.175244 | 2.554778  |
| C | 3.652747  | -4.462841 | 1.883936  |
| H | 3.720027  | -4.997318 | 2.827155  |
| C | 4.499131  | -4.827665 | 0.821321  |
| C | 4.367453  | -4.140916 | -0.399335 |
| H | 5.030596  | -4.386714 | -1.223926 |
| H | 3.334673  | -2.596840 | -1.494045 |
| C | -1.761962 | 2.083062  | -0.206797 |
| C | -2.798942 | 3.148337  | -0.329321 |
| C | -3.181712 | 3.623146  | -1.590816 |
| C | -3.407059 | 3.676375  | 0.817798  |
| H | -2.701703 | 3.216044  | -2.474158 |
| C | -4.155685 | 4.609607  | -1.700945 |
| H | -4.423803 | 4.990358  | -2.682226 |
| C | -4.775426 | 5.146840  | -0.558200 |
| C | -4.381909 | 4.661294  | 0.702073  |
| H | -4.866789 | 5.043108  | 1.595981  |
| H | -3.112163 | 3.298141  | 1.790765  |
| H | -0.449433 | 0.339170  | 3.353859  |
| B | -1.302506 | -0.157672 | 4.021883  |
| B | -1.979795 | -1.762968 | 3.673238  |
| B | -0.942918 | -1.512644 | 5.105647  |
| B | -2.986564 | -0.309403 | 3.472989  |
| B | -2.562538 | 0.828591  | 4.783134  |
| B | -1.294428 | 0.091328  | 5.793487  |
| C | -2.423428 | -2.364838 | 5.218672  |
| B | -3.657329 | -1.758993 | 4.225639  |
| H | -1.655178 | -2.512913 | 2.820817  |
| B | -1.986622 | -1.368251 | 6.546356  |
| H | 0.078668  | -2.108779 | 5.184124  |
| C | -3.897905 | -0.232695 | 4.924922  |
| H | -3.452703 | 0.085791  | 2.462766  |
| B | -2.988869 | 0.080122  | 6.346784  |
| H | -2.754306 | 1.986881  | 4.619435  |
| H | -0.465051 | 0.740403  | 6.342401  |
| B | -3.662920 | -1.518723 | 6.002275  |
| H | -4.528842 | -2.423093 | 3.778973  |
| H | -1.674421 | -1.868255 | 7.574832  |
| H | -4.896860 | 0.185079  | 4.865493  |
| H | -3.469105 | 0.725230  | 7.217629  |
| H | -4.535705 | -2.039261 | 6.607500  |
| H | 0.496971  | 0.623441  | -3.342330 |



|   |           |           |           |
|---|-----------|-----------|-----------|
| B | 1.452062  | 0.324958  | -3.990768 |
| B | 2.143799  | -1.310849 | -3.961320 |
| B | 1.285556  | -0.719185 | -5.412554 |
| B | 3.062437  | 0.051781  | -3.280892 |
| B | 2.760444  | 1.475848  | -4.314989 |
| B | 1.659083  | 1.007865  | -5.632290 |
| C | 2.799248  | -1.508381 | -5.536803 |
| B | 3.875760  | -1.161556 | -4.273813 |
| H | 1.742666  | -2.252457 | -3.369567 |
| B | 2.494754  | -0.214528 | -6.624075 |
| H | 0.305570  | -1.282737 | -5.769389 |
| C | 4.142907  | 0.491862  | -4.538139 |
| H | 3.387575  | 0.188937  | -2.155693 |
| B | 3.407430  | 1.144213  | -5.944813 |
| H | 2.886184  | 2.559603  | -3.852995 |
| H | 0.880862  | 1.768118  | -6.108534 |
| B | 4.093993  | -0.485556 | -5.920463 |
| H | 4.708372  | -1.911412 | -3.893954 |
| H | 2.332073  | -0.445203 | -7.775380 |
| H | 5.109311  | 0.888104  | -4.246472 |
| H | 3.967919  | 1.988667  | -6.559573 |
| H | 5.054789  | -0.834415 | -6.515524 |
| H | -2.389903 | -3.438900 | 5.364350  |
| H | 2.825218  | -2.512209 | -5.946293 |
| C | 6.349643  | 5.402101  | 1.147370  |
| C | 7.286217  | 5.163160  | 2.167827  |
| C | 6.538684  | 6.521537  | 0.318625  |
| C | 8.375126  | 6.014234  | 2.352714  |
| H | 7.171714  | 4.288598  | 2.802136  |
| C | 7.626966  | 7.373173  | 0.503812  |
| H | 5.810747  | 6.738840  | -0.458007 |
| C | 8.550373  | 7.123031  | 1.521534  |
| H | 9.092247  | 5.806222  | 3.142452  |
| H | 7.748972  | 8.238479  | -0.142383 |
| H | 9.398722  | 7.786482  | 1.666013  |
| C | -5.817080 | 6.195816  | -0.679268 |
| C | -5.879872 | 7.260112  | 0.236637  |
| C | -6.768013 | 6.150171  | -1.713371 |
| C | -6.860055 | 8.245216  | 0.122275  |
| H | -5.137248 | 7.327892  | 1.026747  |
| C | -7.748769 | 7.134579  | -1.827466 |
| H | -6.752652 | 5.321607  | -2.415937 |
| C | -7.799131 | 8.186610  | -0.910076 |
| H | -6.884799 | 9.064641  | 0.835818  |
| H | -8.479732 | 7.075288  | -2.629589 |
| H | -8.563031 | 8.954275  | -0.999042 |
| C | -6.177731 | -5.251883 | -1.473409 |
| C | -6.908919 | -5.238659 | -2.673719 |
| C | -6.513482 | -6.208373 | -0.499788 |
| C | -7.940716 | -6.150512 | -2.892835 |
| H | -6.682350 | -4.489876 | -3.427549 |
| C | -7.544648 | -7.120940 | -0.718917 |
| H | -5.942481 | -6.252468 | 0.423499  |
| C | -8.263051 | -7.095932 | -1.916519 |
| H | -8.499334 | -6.116863 | -3.824492 |
| H | -7.781770 | -7.858208 | 0.043611  |
| H | -9.066971 | -7.806710 | -2.087439 |
| C | 5.503908  | -5.906534 | 0.983962  |
| C | 5.761442  | -6.814711 | -0.057389 |
| C | 6.222960  | -6.047252 | 2.183459  |
| C | 6.705573  | -7.829297 | 0.095447  |
| H | 5.196550  | -6.739076 | -0.982360 |
| C | 7.167788  | -7.061165 | 2.336310  |

|   |          |           |           |
|---|----------|-----------|-----------|
| H | 6.057638 | -5.338972 | 2.990514  |
| C | 7.413043 | -7.956903 | 1.293011  |
| H | 6.882709 | -8.526654 | -0.719135 |
| H | 7.719139 | -7.146505 | 3.268995  |
| H | 8.148875 | -8.747524 | 1.412196  |

\*\*\*\*\*

# CuPhCB

\*\*\*\*\*

146

scf done: -3399.630102

|    |           |           |           |
|----|-----------|-----------|-----------|
| Cu | 0.133935  | -0.126625 | -1.258108 |
| O  | -1.199780 | 1.323296  | 1.123276  |
| O  | -1.362297 | 1.141344  | -1.128639 |
| C  | -8.406719 | 6.232373  | -0.993178 |
| C  | -6.096634 | 5.450784  | 0.020639  |
| C  | -4.941078 | 4.474885  | -0.000356 |
| C  | -4.473469 | 3.924518  | -1.202315 |
| H  | -4.928709 | 4.204426  | -2.144104 |
| C  | -3.424961 | 3.009848  | -1.205633 |
| H  | -3.070975 | 2.583524  | -2.137575 |
| C  | -2.819558 | 2.625557  | -0.003679 |
| C  | -3.275251 | 3.177439  | 1.199685  |
| H  | -2.805036 | 2.881027  | 2.130557  |
| C  | -4.323481 | 4.091621  | 1.199657  |
| H  | -4.666313 | 4.504996  | 2.140527  |
| C  | -1.711489 | 1.625819  | -0.003354 |
| B  | -7.834155 | 6.973107  | 1.599682  |
| H  | -8.193464 | 7.317973  | 2.678062  |
| B  | -7.242543 | 5.320264  | 1.315129  |
| H  | -7.094454 | 4.463961  | 2.119828  |
| B  | -8.787987 | 5.829676  | 0.624892  |
| H  | -9.850713 | 5.371692  | 0.881546  |
| B  | -8.620925 | 7.528582  | 0.105927  |
| H  | -9.591316 | 8.203835  | 0.018699  |
| B  | -6.968591 | 8.071614  | 0.476454  |
| H  | -6.713276 | 9.196849  | 0.758468  |
| B  | -6.121585 | 6.701785  | 1.218622  |
| H  | -5.213552 | 6.773765  | 1.976157  |
| B  | -7.661025 | 4.859590  | -0.336159 |
| H  | -7.854964 | 3.757457  | -0.717182 |
| B  | -7.391728 | 7.603759  | -1.184279 |
| H  | -7.536668 | 8.309746  | -2.125181 |
| B  | -5.841318 | 7.090354  | -0.496351 |
| H  | -4.764488 | 7.396175  | -0.883959 |
| B  | -6.804668 | 5.962302  | -1.451566 |
| H  | -6.520298 | 5.537626  | -2.515753 |
| Cu | 0.135212  | -0.110168 | 1.248970  |
| O  | -1.145134 | -1.610142 | -1.124357 |
| O  | 1.400544  | 1.369555  | -1.140939 |
| O  | 1.625508  | -1.394509 | -1.127186 |
| O  | 1.469922  | -1.541459 | 1.128258  |
| O  | 1.564243  | 1.226784  | 1.114006  |
| O  | -1.308801 | -1.433709 | 1.128084  |
| C  | 1.975838  | -1.863265 | 0.004200  |
| C  | 8.604917  | -6.545717 | 1.111647  |
| B  | 9.029903  | -6.158492 | -0.498087 |
| B  | 8.813243  | -7.850984 | 0.022310  |
| B  | 7.903847  | -5.157971 | 0.433576  |
| B  | 7.556179  | -7.893077 | 1.286391  |
| B  | 7.001030  | -6.237389 | 1.534532  |
| C  | 6.334280  | -5.718207 | 0.045495  |

|   |           |           |           |
|---|-----------|-----------|-----------|
| C | 5.189049  | -4.730313 | 0.043577  |
| B | 7.512483  | -5.617731 | -1.223221 |
| B | 6.357352  | -6.971829 | -1.148543 |
| B | 6.033216  | -7.348278 | 0.562794  |
| C | 4.611302  | -4.285469 | 1.241307  |
| C | 4.681181  | -4.242476 | -1.169764 |
| H | 4.973372  | -4.656406 | 2.192018  |
| C | 3.568187  | -3.365055 | 1.229186  |
| H | 3.127665  | -3.021851 | 2.158508  |
| C | 3.078280  | -2.869283 | 0.015423  |
| C | 3.639932  | -3.320076 | -1.185204 |
| H | 3.256268  | -2.940442 | -2.125556 |
| H | 5.102078  | -4.582924 | -2.108223 |
| B | 8.071895  | -7.284507 | -1.490023 |
| H | 8.447251  | -7.640915 | -2.559125 |
| B | 7.157733  | -8.358574 | -0.382068 |
| H | 7.410490  | -4.762711 | -2.036053 |
| H | 10.107664 | -5.725235 | -0.734038 |
| H | 9.766430  | -8.547086 | 0.132738  |
| H | 6.883829  | -9.479320 | -0.664577 |
| H | 5.462623  | -7.017330 | -1.924257 |
| H | 8.115214  | -4.059113 | 0.814696  |
| H | 7.665091  | -8.598714 | 2.232397  |
| H | 4.941480  | -7.627427 | 0.928377  |
| H | 6.705738  | -5.797763 | 2.589774  |
| C | 1.873398  | 1.730468  | -0.014515 |
| C | 2.869866  | 2.841565  | -0.014650 |
| C | 3.361713  | 3.347990  | 1.193887  |
| C | 3.307109  | 3.402285  | -1.220659 |
| H | 3.018101  | 2.917649  | 2.127812  |
| C | 4.273767  | 4.398719  | 1.196416  |
| H | 4.629912  | 4.786367  | 2.142388  |
| C | 4.719675  | 4.962806  | -0.007050 |
| C | 4.220726  | 4.451155  | -1.214851 |
| C | 5.683096  | 6.129200  | -0.010028 |
| H | 4.533635  | 4.882990  | -2.158226 |
| H | 2.919814  | 3.015612  | -2.156663 |
| B | 5.305533  | 7.469052  | -1.043066 |
| B | 5.191819  | 7.615760  | 0.728829  |
| B | 6.651627  | 6.381913  | -1.398568 |
| B | 6.471426  | 6.615605  | 1.457481  |
| B | 7.363851  | 5.842545  | 0.148217  |
| C | 8.015300  | 7.131739  | -0.746273 |
| B | 6.868703  | 8.127810  | -1.544813 |
| B | 7.721606  | 8.684378  | -0.082293 |
| B | 8.032218  | 7.268283  | 0.957190  |
| B | 5.963064  | 8.904897  | -0.224893 |
| H | 5.462116  | 9.972779  | -0.364619 |
| B | 6.683817  | 8.374002  | 1.327036  |
| H | 7.126454  | 8.577161  | -2.610903 |
| H | 4.326809  | 7.407049  | -1.707146 |
| H | 4.121788  | 7.650769  | 1.237270  |
| H | 6.698135  | 9.061029  | 2.295763  |
| H | 8.556881  | 9.519759  | -0.181311 |
| H | 6.709942  | 5.618031  | -2.298141 |
| H | 6.293341  | 6.012467  | 2.459459  |
| H | 9.054122  | 7.155621  | 1.547057  |
| H | 7.829067  | 4.756188  | 0.173490  |
| C | -1.652842 | -1.920137 | 0.002088  |
| C | -2.754404 | -2.927154 | 0.002981  |
| C | -3.214571 | -3.475646 | -1.200158 |
| C | -3.356829 | -3.313221 | 1.205946  |
| H | -2.747029 | -3.177566 | -2.131873 |

|   |           |           |           |
|---|-----------|-----------|-----------|
| C | -4.265884 | -4.386479 | -1.198999 |
| H | -4.613321 | -4.796111 | -2.139828 |
| C | -4.882107 | -4.769412 | 0.001867  |
| C | -4.408149 | -4.224487 | 1.203773  |
| C | -6.044274 | -5.737477 | -0.017717 |
| H | -4.861760 | -4.504668 | 2.146267  |
| H | -2.999701 | -2.889135 | 2.137678  |
| B | -5.798990 | -7.379690 | 0.494764  |
| B | -6.081907 | -6.985078 | -1.218461 |
| B | -6.751389 | -6.247338 | 1.455640  |
| B | -7.193506 | -5.595506 | -1.308242 |
| B | -7.603541 | -5.136117 | 0.345640  |
| C | -8.356821 | -6.505156 | 1.001674  |
| B | -7.350784 | -7.884021 | 1.186348  |
| B | -8.583367 | -7.797299 | -0.099944 |
| B | -8.740232 | -6.095805 | -0.614112 |
| B | -6.935965 | -8.350777 | -0.476798 |
| H | -6.689469 | -9.477104 | -0.762277 |
| B | -7.797465 | -7.243552 | -1.594692 |
| H | -7.497666 | -8.591190 | 2.126070  |
| H | -4.723123 | -7.693962 | 0.878284  |
| H | -5.176734 | -7.061541 | -1.978963 |
| H | -8.162601 | -7.583384 | -2.672705 |
| H | -9.558204 | -8.465926 | -0.011277 |
| H | -6.460752 | -5.827200 | 2.519946  |
| H | -7.041895 | -4.738264 | -2.111244 |
| H | -9.800540 | -5.629791 | -0.866285 |
| H | -7.788467 | -4.033567 | 0.729903  |
| H | 8.959371  | 6.952297  | -1.248996 |
| H | -9.165749 | 6.062656  | -1.748906 |
| H | 9.350949  | -6.389985 | 1.883171  |
| H | -9.112222 | -6.331883 | 1.760238  |

\*\*\*\*\*

CuPhCB\_MeOH

\*\*\*\*\*

158

scf done: -3631.122083

|    |           |           |           |
|----|-----------|-----------|-----------|
| Cu | 0.116789  | -0.131246 | -1.294794 |
| O  | -1.178198 | 1.399993  | 1.135461  |
| O  | -1.451311 | 1.109804  | -1.090211 |
| O  | -0.030638 | 0.171667  | -3.486986 |
| H  | 0.078043  | 1.137016  | -3.520250 |
| C  | -8.464962 | 6.244330  | -0.866302 |
| C  | -6.135938 | 5.471000  | 0.111019  |
| C  | -4.979840 | 4.496060  | 0.072115  |
| C  | -4.554315 | 3.917455  | -1.132110 |
| H  | -5.043975 | 4.174050  | -2.063402 |
| C  | -3.505464 | 3.002959  | -1.149172 |
| H  | -3.184783 | 2.554190  | -2.082750 |
| C  | -2.855722 | 2.646715  | 0.037398  |
| C  | -3.271872 | 3.225492  | 1.242045  |
| H  | -2.768879 | 2.947740  | 2.161577  |
| C  | -4.321715 | 4.138265  | 1.258141  |
| H  | -4.635008 | 4.569457  | 2.201425  |
| C  | -1.743203 | 1.645317  | 0.025291  |
| C  | -1.337445 | -0.170691 | -3.984976 |
| H  | -2.117642 | 0.333186  | -3.405645 |
| H  | -1.435826 | -1.247817 | -3.847461 |
| H  | -1.421938 | 0.075972  | -5.049655 |
| B  | -7.854768 | 6.986459  | 1.717534  |
| H  | -8.198658 | 7.329837  | 2.801470  |

|    |           |           |           |
|----|-----------|-----------|-----------|
| B  | -7.260622 | 5.336158  | 1.423371  |
| H  | -7.094524 | 4.480309  | 2.224988  |
| B  | -8.819188 | 5.839789  | 0.757649  |
| H  | -9.876180 | 5.377674  | 1.030458  |
| B  | -8.667366 | 7.539235  | 0.236362  |
| H  | -9.641759 | 8.210650  | 0.164424  |
| B  | -7.011713 | 8.089028  | 0.581396  |
| H  | -6.756697 | 9.215272  | 0.859896  |
| B  | -6.147327 | 6.722470  | 1.309218  |
| H  | -5.228859 | 6.801069  | 2.053184  |
| B  | -7.703569 | 4.874760  | -0.221300 |
| H  | -7.899726 | 3.772089  | -0.599809 |
| B  | -7.458277 | 7.619833  | -1.072346 |
| H  | -7.620849 | 8.325311  | -2.010892 |
| B  | -5.895413 | 7.112301  | -0.408971 |
| H  | -4.826335 | 7.423381  | -0.813595 |
| B  | -6.868862 | 5.980801  | -1.349310 |
| H  | -6.598910 | 5.558832  | -2.418419 |
| Cu | 0.120250  | -0.074490 | 1.301031  |
| O  | -1.117878 | -1.664583 | -1.092399 |
| O  | 1.320267  | 1.445334  | -1.155736 |
| O  | 1.669583  | -1.338838 | -1.107978 |
| O  | 1.424969  | -1.580889 | 1.126837  |
| O  | 0.224759  | -0.385507 | 3.498157  |
| O  | 1.607601  | 1.220756  | 1.077644  |
| O  | -1.367684 | -1.390841 | 1.140725  |
| C  | 1.975081  | -1.850908 | 0.012200  |
| H  | 0.004396  | -1.331684 | 3.531450  |
| C  | 1.567709  | -0.202188 | 3.983655  |
| C  | 8.631017  | -6.512882 | 1.112593  |
| B  | 9.060667  | -6.122225 | -0.494419 |
| B  | 8.842008  | -7.815863 | 0.021062  |
| B  | 7.931827  | -5.123039 | 0.435363  |
| B  | 7.581327  | -7.860045 | 1.281256  |
| B  | 7.026028  | -6.204340 | 1.530948  |
| C  | 6.362751  | -5.682394 | 0.041476  |
| C  | 5.212912  | -4.699842 | 0.041485  |
| B  | 7.545954  | -5.579378 | -1.222947 |
| B  | 6.389494  | -6.932524 | -1.155729 |
| B  | 6.061240  | -7.313319 | 0.553986  |
| C  | 4.587469  | -4.315486 | 1.236178  |
| C  | 4.742543  | -4.162394 | -1.165666 |
| H  | 4.916280  | -4.730285 | 2.181076  |
| C  | 3.537647  | -3.402393 | 1.226424  |
| H  | 3.057971  | -3.108695 | 2.153440  |
| C  | 3.086532  | -2.853396 | 0.021228  |
| C  | 3.694573  | -3.246955 | -1.176461 |
| H  | 3.339573  | -2.826412 | -2.110757 |
| H  | 5.196970  | -4.459617 | -2.103219 |
| H  | 2.277548  | -0.787242 | 3.390098  |
| H  | 1.789190  | 0.857543  | 3.854694  |
| H  | 1.635060  | -0.468165 | 5.044909  |
| B  | 8.105244  | -7.245695 | -1.492075 |
| H  | 8.484232  | -7.599586 | -2.560797 |
| B  | 7.187670  | -8.321983 | -0.389536 |
| H  | 7.451663  | -4.723650 | -2.035641 |
| H  | 10.139303 | -5.688868 | -0.726464 |
| H  | 9.794854  | -8.512370 | 0.132716  |
| H  | 6.914671  | -9.442313 | -0.674877 |
| H  | 5.496754  | -6.973042 | -1.934102 |
| H  | 8.143110  | -4.025319 | 0.819826  |
| H  | 7.687236  | -8.567963 | 2.226035  |
| H  | 4.968456  | -7.593237 | 0.915933  |

|   |           |           |           |
|---|-----------|-----------|-----------|
| H | 6.728075  | -5.765031 | 2.585759  |
| C | 1.849850  | 1.765160  | -0.045098 |
| C | 2.843686  | 2.883448  | -0.058748 |
| C | 3.311952  | 3.427502  | 1.142116  |
| C | 3.303003  | 3.411496  | -1.270635 |
| H | 2.949265  | 3.024103  | 2.080902  |
| C | 4.220354  | 4.481655  | 1.132179  |
| H | 4.554803  | 4.900583  | 2.072912  |
| C | 4.690239  | 5.010015  | -0.078320 |
| C | 4.215517  | 4.461660  | -1.279439 |
| C | 5.651042  | 6.178352  | -0.095410 |
| H | 4.546938  | 4.865162  | -2.229109 |
| H | 2.935912  | 2.994074  | -2.201602 |
| B | 5.266325  | 7.509386  | -1.137177 |
| B | 5.157022  | 7.668484  | 0.633778  |
| B | 6.615768  | 6.425067  | -1.488034 |
| B | 6.441836  | 6.677680  | 1.366074  |
| B | 7.333604  | 5.899103  | 0.060089  |
| C | 7.978285  | 7.184553  | -0.844691 |
| B | 6.825798  | 8.170654  | -1.647269 |
| B | 7.680647  | 8.740591  | -0.190940 |
| B | 7.998990  | 7.332900  | 0.857531  |
| B | 5.921091  | 8.953685  | -0.330588 |
| H | 5.416149  | 10.018974 | -0.476234 |
| B | 6.647619  | 8.436075  | 1.223203  |
| H | 7.079410  | 8.613492  | -2.717157 |
| H | 4.286348  | 7.437902  | -1.798614 |
| H | 4.088196  | 7.703887  | 1.144712  |
| H | 6.661971  | 9.130179  | 2.186957  |
| H | 8.512655  | 9.578308  | -0.298108 |
| H | 6.676842  | 5.656737  | -2.383530 |
| H | 6.268418  | 6.079576  | 2.372014  |
| H | 9.022879  | 7.228188  | 1.445546  |
| H | 7.803542  | 4.814933  | 0.091594  |
| C | -1.662695 | -1.925715 | 0.026308  |
| C | -2.759933 | -2.943722 | 0.025244  |
| C | -3.064036 | -3.656767 | -1.140025 |
| C | -3.509952 | -3.178688 | 1.182904  |
| H | -2.478819 | -3.479288 | -2.035378 |
| C | -4.103813 | -4.580716 | -1.148715 |
| H | -4.320741 | -5.126554 | -2.059114 |
| C | -4.872189 | -4.806446 | 0.003164  |
| C | -4.555355 | -4.097687 | 1.170591  |
| C | -6.016093 | -5.795494 | -0.031663 |
| H | -5.125155 | -4.258622 | 2.077495  |
| H | -3.272716 | -2.627886 | 2.086346  |
| B | -5.863743 | -7.293036 | 0.833691  |
| B | -5.828546 | -7.253559 | -0.946531 |
| B | -6.980482 | -6.032746 | 1.362963  |
| B | -6.912261 | -5.955508 | -1.507341 |
| B | -7.618680 | -5.196170 | -0.080688 |
| C | -8.473570 | -6.440033 | 0.691409  |
| B | -7.512665 | -7.714212 | 1.324306  |
| B | -8.490134 | -7.931304 | -0.151642 |
| B | -8.556810 | -6.371968 | -1.015081 |
| B | -6.798958 | -8.481452 | -0.110936 |
| H | -6.500889 | -9.631302 | -0.115694 |
| B | -7.445993 | -7.650828 | -1.562799 |
| H | -7.826228 | -8.229246 | 2.344759  |
| H | -4.874995 | -7.481754 | 1.458384  |
| H | -4.797996 | -7.435147 | -1.502380 |
| H | -7.607451 | -8.209045 | -2.598828 |
| H | -9.462407 | -8.608044 | -0.105965 |

|   |           |           |           |
|---|-----------|-----------|-----------|
| H | -6.891217 | -5.397847 | 2.354412  |
| H | -6.626703 | -5.267563 | -2.427865 |
| H | -9.554965 | -6.007922 | -1.540786 |
| H | -7.875356 | -4.048156 | 0.035873  |
| H | 8.921615  | 7.004994  | -1.348739 |
| H | -9.235141 | 6.071906  | -1.610029 |
| H | 9.374709  | -6.359147 | 1.886770  |
| H | -9.355833 | -6.152716 | 1.252823  |

\*\*\*\*\*

# CuPhCB\_DMF

\*\*\*\*\*

170

scf done: -3896.723886

|   |           |           |           |
|---|-----------|-----------|-----------|
| B | 6.525316  | 6.391309  | 1.350708  |
| H | 6.688792  | 5.485279  | 2.091922  |
| B | 6.837512  | 8.087769  | 1.730681  |
| H | 7.287196  | 8.354639  | 2.794580  |
| B | 5.187186  | 7.542030  | 1.404822  |
| H | 4.334048  | 7.403913  | 2.213869  |
| B | 6.948221  | 6.106182  | -0.361323 |
| H | 7.359338  | 5.032977  | -0.638525 |
| B | 7.528177  | 7.634347  | -1.037567 |
| H | 8.431531  | 7.606084  | -1.804770 |
| B | 7.455394  | 8.864947  | 0.250684  |
| H | 8.327929  | 9.663164  | 0.335917  |
| B | 5.755350  | 9.082014  | 0.725974  |
| H | 5.328414  | 10.118355 | 1.119557  |
| B | 4.780570  | 7.974966  | -0.272202 |
| H | 3.643234  | 8.108437  | -0.577445 |
| B | 5.878526  | 7.093035  | -1.358599 |
| H | 5.506883  | 6.674527  | -2.400653 |
| B | 6.182960  | 8.802724  | -0.989611 |
| H | 6.063194  | 9.637781  | -1.825864 |
| B | 7.119092  | -5.845360 | 1.776045  |
| H | 6.521822  | -5.728512 | 2.788372  |
| B | 6.567154  | -6.750719 | 0.366336  |
| H | 5.482210  | -7.225943 | 0.379974  |
| B | 7.973267  | -7.312813 | 1.290226  |
| H | 7.992704  | -8.228711 | 2.042239  |
| B | 8.058879  | -4.434609 | 1.207605  |
| H | 8.017037  | -3.458211 | 1.872178  |
| B | 8.091079  | -4.468315 | -0.557463 |
| H | 8.003038  | -3.445834 | -1.150122 |
| B | 7.182435  | -5.908858 | -1.074573 |
| H | 6.516349  | -5.866460 | -2.052165 |
| B | 8.011164  | -7.359129 | -0.484744 |
| H | 7.982735  | -8.385561 | -1.081898 |
| B | 9.443681  | -6.812182 | 0.413299  |
| H | 10.450510 | -7.414423 | 0.584343  |
| B | 9.494977  | -5.029871 | 0.367026  |
| H | 10.515677 | -4.444443 | 0.510754  |
| B | 8.955136  | -5.943286 | -1.057398 |
| H | 9.594307  | -5.969071 | -2.058484 |
| C | 7.792331  | 7.222466  | 0.600169  |
| C | 1.625008  | 1.882580  | 0.083139  |
| C | 2.579113  | 3.036892  | 0.092366  |
| C | 2.999964  | 3.598880  | 1.302709  |
| H | 2.623620  | 3.187898  | 2.233117  |
| C | 3.889457  | 4.668925  | 1.308266  |
| H | 4.207017  | 5.086648  | 2.256632  |
| C | 4.369002  | 5.211028  | 0.105755  |

|    |           |            |           |
|----|-----------|------------|-----------|
| C  | 3.939775  | 4.645169   | -1.102958 |
| H  | 4.290680  | 5.046486   | -2.045151 |
| C  | 3.059035  | 3.567268   | -1.109563 |
| H  | 2.726862  | 3.133573   | -2.046544 |
| C  | 5.331786  | 6.378822   | 0.126225  |
| C  | 1.944774  | -1.662777  | 0.273937  |
| C  | 3.156671  | -2.544498  | 0.305318  |
| C  | 3.871001  | -2.740543  | 1.491436  |
| H  | 3.525924  | -2.258106  | 2.399427  |
| C  | 5.011926  | -3.539076  | 1.500402  |
| H  | 5.555934  | -3.670640  | 2.428675  |
| C  | 5.461608  | -4.163615  | 0.327364  |
| C  | 4.739906  | -3.962468  | -0.857775 |
| H  | 5.069201  | -4.430408  | -1.776932 |
| C  | 3.602034  | -3.162996  | -0.868731 |
| H  | 3.044125  | -3.010263  | -1.786086 |
| C  | 6.709620  | -5.019297  | 0.335621  |
| C  | 8.808064  | -5.870119  | 1.694878  |
| C  | 4.048562  | -1.457822  | -4.253475 |
| H  | 4.449248  | -0.784928  | -3.491222 |
| H  | 4.481580  | -1.191802  | -5.225432 |
| H  | 4.352942  | -2.482206  | -4.004621 |
| C  | 1.885530  | -2.203651  | -5.234736 |
| H  | 2.125008  | -3.256838  | -5.044264 |
| H  | 2.174196  | -1.957405  | -6.263574 |
| H  | 0.815137  | -2.044183  | -5.105155 |
| C  | 1.932258  | -0.542791  | -3.446194 |
| H  | 2.575766  | 0.015956   | -2.754486 |
| Cu | 0.039297  | -0.103045  | -1.313632 |
| N  | 2.598904  | -1.352664  | -4.292033 |
| O  | 1.473602  | 1.269569   | -1.019688 |
| O  | 1.044138  | 1.608787   | 1.177399  |
| O  | 1.378621  | -1.524856  | -0.853429 |
| O  | 1.587013  | -1.116902  | 1.361101  |
| O  | 0.699609  | -0.419007  | -3.411979 |
| Cu | -0.065227 | -0.015227  | 1.351337  |
| O  | -1.407375 | -1.447760  | -1.122931 |
| O  | -1.318283 | 1.328668   | -1.363571 |
| B  | -6.729490 | -6.371700  | -1.209096 |
| H  | -6.913570 | -5.475020  | -1.956029 |
| B  | -7.051878 | -8.068280  | -1.576972 |
| B  | -5.394742 | -7.525383  | -1.276553 |
| B  | -7.127543 | -6.071126  | 0.504988  |
| C  | -7.988730 | -7.190555  | -0.438843 |
| C  | -5.516841 | -6.359577  | -0.000725 |
| H  | -7.517244 | -8.338236  | -2.633270 |
| B  | -7.655745 | -8.832793  | -0.084645 |
| B  | -5.962641 | -9.061232  | -0.580238 |
| H  | -4.549358 | -7.378256  | -2.093005 |
| B  | -4.973369 | -7.953819  | 0.400214  |
| H  | -7.530378 | -4.994316  | 0.780384  |
| B  | -7.707947 | -7.593614  | 1.196679  |
| B  | -6.052880 | -7.057053  | 1.495004  |
| H  | -8.601591 | -7.556734  | 1.974781  |
| B  | -6.368982 | -8.768916  | 1.140392  |
| H  | -8.533737 | -9.626527  | -0.154277 |
| H  | -5.546268 | -10.103048 | -0.970631 |
| H  | -3.832813 | -8.090130  | 0.692087  |
| H  | -5.671257 | -6.623694  | 2.527610  |
| H  | -6.243012 | -9.600482  | 1.979200  |
| B  | -6.933341 | 5.959162   | -2.008841 |
| H  | -6.447000 | 5.711746   | -3.055729 |
| B  | -6.201802 | 6.935654   | -0.733976 |



|   |            |           |           |
|---|------------|-----------|-----------|
| B | -7.627185  | 7.529516  | -1.602886 |
| B | -7.926140  | 4.683581  | -1.248166 |
| C | -6.474301  | 5.231382  | -0.527870 |
| C | -8.602341  | 6.131866  | -1.810966 |
| H | -5.087771  | 7.314837  | -0.868765 |
| B | -6.763956  | 6.277550  | 0.821101  |
| B | -7.522917  | 7.735137  | 0.158146  |
| H | -7.633995  | 8.373531  | -2.435051 |
| B | -9.059450  | 7.235779  | -0.582449 |
| H | -8.005097  | 3.652739  | -1.821572 |
| B | -7.824532  | 4.882757  | 0.501136  |
| B | -9.245445  | 5.473796  | -0.369473 |
| H | -7.783860  | 3.912170  | 1.179220  |
| B | -8.525688  | 6.460727  | 0.925396  |
| H | -6.009405  | 6.246277  | 1.733940  |
| H | -7.369255  | 8.805122  | 0.650719  |
| H | -10.026813 | 7.903201  | -0.738603 |
| H | -10.316847 | 4.966631  | -0.381495 |
| H | -9.083371  | 6.625835  | 1.961358  |
| C | -1.665535  | -1.984837 | -0.003674 |
| C | -2.653384  | -3.112383 | -0.002535 |
| O | -1.172626  | -1.655349 | 1.121299  |
| C | -3.312047  | -3.478740 | -1.181625 |
| C | -2.925453  | -3.814535 | 1.176654  |
| H | -3.089735  | -2.941581 | -2.097064 |
| C | -4.235485  | -4.519783 | -1.176087 |
| H | -4.725721  | -4.795490 | -2.102604 |
| C | -4.522181  | -5.219457 | 0.005960  |
| C | -3.845627  | -4.858999 | 1.179679  |
| H | -4.029638  | -5.399580 | 2.099625  |
| H | -2.400609  | -3.541106 | 2.085564  |
| C | -1.952696  | 1.564087  | -0.289604 |
| C | -3.107919  | 2.515500  | -0.363053 |
| O | -1.703041  | 1.062296  | 0.847956  |
| C | -3.527778  | 3.038250  | -1.590129 |
| C | -3.786183  | 2.885477  | 0.804206  |
| H | -2.999747  | 2.750699  | -2.492771 |
| C | -4.608926  | 3.914473  | -1.648513 |
| H | -4.917560  | 4.305755  | -2.610239 |
| C | -5.293113  | 4.287441  | -0.483187 |
| C | -4.865461  | 3.759768  | 0.744671  |
| H | -5.379836  | 4.033336  | 1.658289  |
| H | -3.453800  | 2.481330  | 1.754322  |
| C | -4.214573  | 0.733605  | 4.287928  |
| H | -4.495437  | -0.067673 | 3.599815  |
| H | -4.587698  | 0.487166  | 5.289365  |
| H | -4.695730  | 1.662578  | 3.956072  |
| N | -2.769010  | 0.886424  | 4.303731  |
| C | -2.210558  | 1.925984  | 5.158035  |
| H | -2.620872  | 2.903477  | 4.876607  |
| H | -2.458369  | 1.728218  | 6.207605  |
| H | -1.128257  | 1.935873  | 5.030431  |
| C | -1.976841  | 0.150845  | 3.499697  |
| H | -2.514525  | -0.564184 | 2.863259  |
| O | -0.743014  | 0.251135  | 3.443238  |
| H | 9.345448   | -5.847981 | 2.636576  |
| H | -8.997757  | -6.915985 | -0.726412 |
| H | -9.208562  | 6.074299  | -2.708303 |
| H | 8.799746   | 6.951587  | 0.896876  |

\*\*\*\*\*

CuPhCB\_CB

\*\*\*\*\*

194

scf done: -4063.974056

|    |            |           |           |
|----|------------|-----------|-----------|
| Cu | 0.039222   | 0.377892  | 1.267801  |
| O  | -1.432075  | 1.242585  | -1.334103 |
| O  | -1.374377  | 1.679623  | 0.885646  |
| C  | -8.363175  | 6.785590  | 0.186080  |
| C  | -6.831180  | 4.820313  | -0.688718 |
| C  | -5.540700  | 4.039255  | -0.574407 |
| C  | -4.917604  | 3.842863  | 0.666315  |
| H  | -5.353696  | 4.256632  | 1.567153  |
| C  | -3.734228  | 3.117768  | 0.760878  |
| H  | -3.255759  | 2.966835  | 1.721743  |
| C  | -3.146711  | 2.572882  | -0.386732 |
| C  | -3.758508  | 2.769917  | -1.629749 |
| H  | -3.300545  | 2.348122  | -2.517681 |
| C  | -4.941499  | 3.497003  | -1.721309 |
| H  | -5.400624  | 3.643158  | -2.691727 |
| C  | -1.889001  | 1.774815  | -0.274656 |
| B  | -8.752697  | 5.919025  | -2.401527 |
| H  | -9.141791  | 6.111779  | -3.507154 |
| B  | -7.011983  | 5.902785  | -2.031118 |
| H  | -6.113963  | 6.009281  | -2.795912 |
| B  | -8.025682  | 7.222755  | -1.431805 |
| H  | -7.923068  | 8.367600  | -1.721301 |
| B  | -9.603729  | 6.532412  | -0.967062 |
| H  | -10.558505 | 7.234994  | -0.949979 |
| B  | -9.568423  | 4.781903  | -1.279065 |
| H  | -10.536623 | 4.167325  | -1.588647 |
| B  | -7.964050  | 4.399685  | -1.930288 |
| H  | -7.706750  | 3.492210  | -2.646795 |
| B  | -6.792180  | 6.502928  | -0.385206 |
| H  | -5.831604  | 7.055701  | 0.026155  |
| B  | -9.343182  | 5.387917  | 0.375000  |
| H  | -10.103263 | 5.327643  | 1.282608  |
| B  | -8.324286  | 4.067064  | -0.219839 |
| H  | -8.286341  | 2.962643  | 0.207599  |
| B  | -7.615699  | 5.373663  | 0.728769  |
| H  | -7.177017  | 5.276386  | 1.820567  |
| Cu | 0.290513   | 0.259899  | -1.277861 |
| O  | 1.385788   | 1.820448  | 1.132308  |
| O  | -1.254527  | -1.101203 | 0.975346  |
| O  | 1.478394   | -0.945580 | 1.414599  |
| O  | 1.949502   | -0.711202 | -0.785956 |
| O  | -0.715449  | -1.424899 | -1.197289 |
| O  | 1.265209   | 1.949997  | -1.126494 |
| C  | 2.165386   | -1.189233 | 0.371812  |
| C  | 7.962930   | -6.980946 | 0.004932  |
| B  | 7.419770   | -7.488548 | 1.544179  |
| B  | 9.110212   | -6.983782 | 1.278190  |
| B  | 6.393512   | -6.530513 | 0.464182  |
| B  | 9.126635   | -5.718853 | 0.021945  |
| B  | 7.456154   | -5.444669 | -0.474245 |
| C  | 6.619827   | -4.895161 | 0.916298  |
| C  | 5.468149   | -3.926403 | 0.765830  |
| B  | 6.531940   | -6.093445 | 2.166399  |
| B  | 7.670251   | -4.727773 | 2.281398  |
| B  | 8.233615   | -4.319354 | 0.641519  |
| C  | 5.118719   | -3.400664 | -0.486167 |
| C  | 4.734364   | -3.525193 | 1.892318  |
| H  | 5.676688   | -3.681992 | -1.370878 |
| C  | 4.057488   | -2.509934 | -0.612121 |
| H  | 3.791983   | -2.106562 | -1.581672 |

|   |           |            |           |
|---|-----------|------------|-----------|
| C | 3.321144  | -2.124952  | 0.514128  |
| C | 3.670988  | -2.636541  | 1.768854  |
| H | 3.102743  | -2.332580  | 2.641018  |
| H | 4.995426  | -3.906994  | 2.872081  |
| B | 8.210295  | -6.370544  | 2.682842  |
| H | 8.463522  | -6.697734  | 3.796292  |
| B | 9.268550  | -5.273989  | 1.736282  |
| H | 5.561448  | -6.148453  | 2.842446  |
| H | 7.142944  | -8.626998  | 1.724055  |
| H | 9.964131  | -7.806182  | 1.280794  |
| H | 10.273997 | -4.821586  | 2.178139  |
| H | 7.451824  | -3.849057  | 3.045580  |
| H | 5.413665  | -6.916721  | -0.072890 |
| H | 9.971952  | -5.694288  | -0.808608 |
| H | 8.377408  | -3.191089  | 0.310352  |
| H | 7.133236  | -5.210037  | -1.585643 |
| C | -1.336811 | -1.724208  | -0.129169 |
| C | -2.240866 | -2.912186  | -0.177587 |
| C | -2.378826 | -3.648141  | -1.360225 |
| C | -2.958759 | -3.299634  | 0.959194  |
| H | -1.830921 | -3.337319  | -2.243310 |
| C | -3.209319 | -4.763820  | -1.398076 |
| H | -3.307720 | -5.321406  | -2.321819 |
| C | -3.919061 | -5.168726  | -0.257581 |
| C | -3.789835 | -4.414538  | 0.917525  |
| C | -4.810006 | -6.389759  | -0.310673 |
| H | -4.339943 | -4.692777  | 1.807991  |
| H | -2.859553 | -2.721885  | 1.870574  |
| B | -6.527356 | -6.176963  | -0.192388 |
| B | -5.766127 | -6.662953  | -1.728161 |
| B | -5.601337 | -6.923437  | 1.111215  |
| B | -4.360683 | -7.694908  | -1.362109 |
| B | -4.253493 | -7.847465  | 0.391671  |
| C | -5.710370 | -8.586778  | 0.850152  |
| B | -7.124770 | -7.646786  | 0.594826  |
| B | -6.728874 | -9.034280  | -0.453124 |
| B | -4.953042 | -9.158745  | -0.570836 |
| B | -7.235821 | -7.488509  | -1.170886 |
| H | -8.281893 | -7.349888  | -1.716231 |
| B | -5.890479 | -8.426343  | -1.896562 |
| H | -8.013094 | -7.706276  | 1.377319  |
| H | -6.947253 | -5.079459  | -0.042023 |
| H | -5.696368 | -5.871746  | -2.607530 |
| H | -5.979419 | -8.954199  | -2.956990 |
| H | -7.372246 | -10.026262 | -0.366603 |
| H | -5.424374 | -6.470107  | 2.186890  |
| H | -3.355547 | -7.612418  | -1.982545 |
| H | -4.413325 | -10.214108 | -0.565704 |
| H | -3.254276 | -7.914943  | 1.019844  |
| C | 1.674257  | 2.348250   | 0.012309  |
| C | 2.574741  | 3.540357   | 0.031313  |
| C | 3.030310  | 4.062767   | 1.247404  |
| C | 2.975009  | 4.144275   | -1.166017 |
| H | 2.720282  | 3.593123   | 2.174232  |
| C | 3.871459  | 5.170497   | 1.264103  |
| H | 4.215337  | 5.560229   | 2.214719  |
| C | 4.275698  | 5.782235   | 0.068029  |
| C | 3.816265  | 5.252693   | -1.146320 |
| C | 5.192332  | 6.985036   | 0.105106  |
| H | 4.115248  | 5.702023   | -2.085258 |
| H | 2.621274  | 3.738300   | -2.107244 |
| B | 6.848659  | 6.797681   | -0.380369 |
| B | 6.416973  | 7.062364   | 1.326769  |

|   |           |           |           |
|---|-----------|-----------|-----------|
| B | 5.701252  | 7.713414  | -1.358314 |
| B | 4.989493  | 8.126728  | 1.395065  |
| B | 4.544263  | 8.524422  | -0.265837 |
| C | 5.898477  | 9.325489  | -0.897241 |
| B | 7.313032  | 8.366217  | -1.060582 |
| B | 7.164192  | 9.591958  | 0.226516  |
| B | 5.449368  | 9.690340  | 0.711433  |
| B | 7.766050  | 7.963199  | 0.609267  |
| H | 8.895351  | 7.754103  | 0.912708  |
| B | 6.611674  | 8.784523  | 1.709818  |
| H | 8.030362  | 8.538776  | -1.988340 |
| H | 7.205453  | 5.733829  | -0.760327 |
| H | 6.509669  | 6.157527  | 2.085800  |
| H | 6.921189  | 9.158776  | 2.793912  |
| H | 7.800815  | 10.589228 | 0.151085  |
| H | 5.307431  | 7.412069  | -2.429798 |
| H | 4.124701  | 7.947458  | 2.183808  |
| H | 4.944452  | 10.734119 | 0.957953  |
| H | 3.442873  | 8.674295  | -0.668180 |
| H | -5.683249 | -9.221252 | 1.729191  |
| H | -8.484988 | 7.583324  | 0.910518  |
| H | 8.049485  | -7.731027 | -0.773531 |
| H | 5.712642  | 10.076472 | -1.657212 |
| H | 0.204549  | 0.158858  | -3.375933 |
| B | 0.845912  | -0.532241 | -4.106604 |
| B | 1.522414  | -2.102439 | -3.613368 |
| B | 0.185818  | -2.026098 | -4.795338 |
| B | 2.602229  | -0.726492 | -3.931358 |
| B | 1.927858  | 0.190477  | -5.309125 |
| B | 0.427945  | -0.607072 | -5.844274 |
| C | 1.562763  | -3.004855 | -5.071471 |
| B | 3.019870  | -2.337039 | -4.521199 |
| H | 1.379198  | -2.659331 | -2.582934 |
| B | 0.863415  | -2.229975 | -6.434427 |
| H | -0.848292 | -2.538736 | -4.525142 |
| C | 3.148671  | -0.986585 | -5.537920 |
| H | 3.310519  | -0.196940 | -3.147091 |
| B | 1.940889  | -0.859183 | -6.752279 |
| H | 2.198223  | 1.339132  | -5.420254 |
| H | -0.481220 | 0.000836  | -6.306684 |
| B | 2.614362  | -2.419776 | -6.265192 |
| H | 3.944936  | -2.980411 | -4.159948 |
| H | 0.296861  | -2.878894 | -7.248270 |
| H | 4.148963  | -0.649594 | -5.786783 |
| H | 2.226197  | -0.422767 | -7.816505 |
| H | 3.297269  | -3.112520 | -6.937592 |
| H | -0.140643 | 0.691731  | 3.367439  |
| B | -1.055486 | 0.430165  | 4.088206  |
| B | -1.740963 | -1.204769 | 4.186504  |
| B | -0.802670 | -0.536539 | 5.552896  |
| B | -2.702276 | 0.117075  | 3.488026  |
| B | -2.346874 | 1.595396  | 4.426165  |
| B | -1.169221 | 1.199091  | 5.701036  |
| C | -2.304161 | -1.318972 | 5.804394  |
| B | -3.453204 | -1.041648 | 4.589158  |
| H | -1.367176 | -2.176523 | 3.625979  |
| B | -1.942991 | 0.030589  | 6.802983  |
| H | 0.198138  | -1.080207 | 5.881127  |
| C | -3.710029 | 0.623327  | 4.779350  |
| H | -3.095496 | 0.192055  | 2.378745  |
| B | -2.898181 | 1.350202  | 6.105647  |
| H | -2.501684 | 2.653340  | 3.915982  |
| H | -0.368284 | 1.984919  | 6.089395  |

|   |           |           |           |
|---|-----------|-----------|-----------|
| B | -3.578913 | -0.278507 | 6.206668  |
| H | -4.302535 | -1.811893 | 4.297422  |
| H | -1.714183 | -0.138342 | 7.953394  |
| H | -4.693297 | 1.002381  | 4.523120  |
| H | -3.425989 | 2.226147  | 6.704625  |
| H | -4.502591 | -0.595627 | 6.873452  |
| H | 1.453324  | -4.081036 | -4.994826 |
| H | -2.302252 | -2.299608 | 6.267419  |

\*\*\*\*\*

# CuPhCB

\*\*\*\*\*

146

scf done: -3399.630102

|    |           |           |           |
|----|-----------|-----------|-----------|
| Cu | 0.133935  | -0.126625 | -1.258108 |
| O  | -1.199780 | 1.323296  | 1.123276  |
| O  | -1.362297 | 1.141344  | -1.128639 |
| C  | -8.406719 | 6.232373  | -0.993178 |
| C  | -6.096634 | 5.450784  | 0.020639  |
| C  | -4.941078 | 4.474885  | -0.000356 |
| C  | -4.473469 | 3.924518  | -1.202315 |
| H  | -4.928709 | 4.204426  | -2.144104 |
| C  | -3.424961 | 3.009848  | -1.205633 |
| H  | -3.070975 | 2.583524  | -2.137575 |
| C  | -2.819558 | 2.625557  | -0.003679 |
| C  | -3.275251 | 3.177439  | 1.199685  |
| H  | -2.805036 | 2.881027  | 2.130557  |
| C  | -4.323481 | 4.091621  | 1.199657  |
| H  | -4.666313 | 4.504996  | 2.140527  |
| C  | -1.711489 | 1.625819  | -0.003354 |
| B  | -7.834155 | 6.973107  | 1.599682  |
| H  | -8.193464 | 7.317973  | 2.678062  |
| B  | -7.242543 | 5.320264  | 1.315129  |
| H  | -7.094454 | 4.463961  | 2.119828  |
| B  | -8.787987 | 5.829676  | 0.624892  |
| H  | -9.850713 | 5.371692  | 0.881546  |
| B  | -8.620925 | 7.528582  | 0.105927  |
| H  | -9.591316 | 8.203835  | 0.018699  |
| B  | -6.968591 | 8.071614  | 0.476454  |
| H  | -6.713276 | 9.196849  | 0.758468  |
| B  | -6.121585 | 6.701785  | 1.218622  |
| H  | -5.213552 | 6.773765  | 1.976157  |
| B  | -7.661025 | 4.859590  | -0.336159 |
| H  | -7.854964 | 3.757457  | -0.717182 |
| B  | -7.391728 | 7.603759  | -1.184279 |
| H  | -7.536668 | 8.309746  | -2.125181 |
| B  | -5.841318 | 7.090354  | -0.496351 |
| H  | -4.764488 | 7.396175  | -0.883959 |
| B  | -6.804668 | 5.962302  | -1.451566 |
| H  | -6.520298 | 5.537626  | -2.515753 |
| Cu | 0.135212  | -0.110168 | 1.248970  |
| O  | -1.145134 | -1.610142 | -1.124357 |
| O  | 1.400544  | 1.369555  | -1.140939 |
| O  | 1.625508  | -1.394509 | -1.127186 |
| O  | 1.469922  | -1.541459 | 1.128258  |
| O  | 1.564243  | 1.226784  | 1.114006  |
| O  | -1.308801 | -1.433709 | 1.128084  |
| C  | 1.975838  | -1.863265 | 0.004200  |
| C  | 8.604917  | -6.545717 | 1.111647  |
| B  | 9.029903  | -6.158492 | -0.498087 |
| B  | 8.813243  | -7.850984 | 0.022310  |
| B  | 7.903847  | -5.157971 | 0.433576  |

|   |           |           |           |
|---|-----------|-----------|-----------|
| B | 7.556179  | -7.893077 | 1.286391  |
| B | 7.001030  | -6.237389 | 1.534532  |
| C | 6.334280  | -5.718207 | 0.045495  |
| C | 5.189049  | -4.730313 | 0.043577  |
| B | 7.512483  | -5.617731 | -1.223221 |
| B | 6.357352  | -6.971829 | -1.148543 |
| B | 6.033216  | -7.348278 | 0.562794  |
| C | 4.611302  | -4.285469 | 1.241307  |
| C | 4.681181  | -4.242476 | -1.169764 |
| H | 4.973372  | -4.656406 | 2.192018  |
| C | 3.568187  | -3.365055 | 1.229186  |
| H | 3.127665  | -3.021851 | 2.158508  |
| C | 3.078280  | -2.869283 | 0.015423  |
| C | 3.639932  | -3.320076 | -1.185204 |
| H | 3.256268  | -2.940442 | -2.125556 |
| H | 5.102078  | -4.582924 | -2.108223 |
| B | 8.071895  | -7.284507 | -1.490023 |
| H | 8.447251  | -7.640915 | -2.559125 |
| B | 7.157733  | -8.358574 | -0.382068 |
| H | 7.410490  | -4.762711 | -2.036053 |
| H | 10.107664 | -5.725235 | -0.734038 |
| H | 9.766430  | -8.547086 | 0.132738  |
| H | 6.883829  | -9.479320 | -0.664577 |
| H | 5.462623  | -7.017330 | -1.924257 |
| H | 8.115214  | -4.059113 | 0.814696  |
| H | 7.665091  | -8.598714 | 2.232397  |
| H | 4.941480  | -7.627427 | 0.928377  |
| H | 6.705738  | -5.797763 | 2.589774  |
| C | 1.873398  | 1.730468  | -0.014515 |
| C | 2.869866  | 2.841565  | -0.014650 |
| C | 3.361713  | 3.347990  | 1.193887  |
| C | 3.307109  | 3.402285  | -1.220659 |
| H | 3.018101  | 2.917649  | 2.127812  |
| C | 4.273767  | 4.398719  | 1.196416  |
| H | 4.629912  | 4.786367  | 2.142388  |
| C | 4.719675  | 4.962806  | -0.007050 |
| C | 4.220726  | 4.451155  | -1.214851 |
| C | 5.683096  | 6.129200  | -0.010028 |
| H | 4.533635  | 4.882990  | -2.158226 |
| H | 2.919814  | 3.015612  | -2.156663 |
| B | 5.305533  | 7.469052  | -1.043066 |
| B | 5.191819  | 7.615760  | 0.728829  |
| B | 6.651627  | 6.381913  | -1.398568 |
| B | 6.471426  | 6.615605  | 1.457481  |
| B | 7.363851  | 5.842545  | 0.148217  |
| C | 8.015300  | 7.131739  | -0.746273 |
| B | 6.868703  | 8.127810  | -1.544813 |
| B | 7.721606  | 8.684378  | -0.082293 |
| B | 8.032218  | 7.268283  | 0.957190  |
| B | 5.963064  | 8.904897  | -0.224893 |
| H | 5.462116  | 9.972779  | -0.364619 |
| B | 6.683817  | 8.374002  | 1.327036  |
| H | 7.126454  | 8.577161  | -2.610903 |
| H | 4.326809  | 7.407049  | -1.707146 |
| H | 4.121788  | 7.650769  | 1.237270  |
| H | 6.698135  | 9.061029  | 2.295763  |
| H | 8.556881  | 9.519759  | -0.181311 |
| H | 6.709942  | 5.618031  | -2.298141 |
| H | 6.293341  | 6.012467  | 2.459459  |
| H | 9.054122  | 7.155621  | 1.547057  |
| H | 7.829067  | 4.756188  | 0.173490  |
| C | -1.652842 | -1.920137 | 0.002088  |
| C | -2.754404 | -2.927154 | 0.002981  |

|   |           |           |           |
|---|-----------|-----------|-----------|
| C | -3.214571 | -3.475646 | -1.200158 |
| C | -3.356829 | -3.313221 | 1.205946  |
| H | -2.747029 | -3.177566 | -2.131873 |
| C | -4.265884 | -4.386479 | -1.198999 |
| H | -4.613321 | -4.796111 | -2.139828 |
| C | -4.882107 | -4.769412 | 0.001867  |
| C | -4.408149 | -4.224487 | 1.203773  |
| C | -6.044274 | -5.737477 | -0.017717 |
| H | -4.861760 | -4.504668 | 2.146267  |
| H | -2.999701 | -2.889135 | 2.137678  |
| B | -5.798990 | -7.379690 | 0.494764  |
| B | -6.081907 | -6.985078 | -1.218461 |
| B | -6.751389 | -6.247338 | 1.455640  |
| B | -7.193506 | -5.595506 | -1.308242 |
| B | -7.603541 | -5.136117 | 0.345640  |
| C | -8.356821 | -6.505156 | 1.001674  |
| B | -7.350784 | -7.884021 | 1.186348  |
| B | -8.583367 | -7.797299 | -0.099944 |
| B | -8.740232 | -6.095805 | -0.614112 |
| B | -6.935965 | -8.350777 | -0.476798 |
| H | -6.689469 | -9.477104 | -0.762277 |
| B | -7.797465 | -7.243552 | -1.594692 |
| H | -7.497666 | -8.591190 | 2.126070  |
| H | -4.723123 | -7.693962 | 0.878284  |
| H | -5.176734 | -7.061541 | -1.978963 |
| H | -8.162601 | -7.583384 | -2.672705 |
| H | -9.558204 | -8.465926 | -0.011277 |
| H | -6.460752 | -5.827200 | 2.519946  |
| H | -7.041895 | -4.738264 | -2.111244 |
| H | -9.800540 | -5.629791 | -0.866285 |
| H | -7.788467 | -4.033567 | 0.729903  |
| H | 8.959371  | 6.952297  | -1.248996 |
| H | -9.165749 | 6.062656  | -1.748906 |
| H | 9.350949  | -6.389985 | 1.883171  |
| H | -9.112222 | -6.331883 | 1.760238  |

\*\*\*\*\*

CuPhCB\_1CB

\*\*\*\*\*

170

scf done: -3731.802510

|    |           |           |           |
|----|-----------|-----------|-----------|
| Cu | -0.347428 | -0.187693 | 0.718302  |
| O  | 1.021250  | -1.474071 | -1.757295 |
| O  | 0.836285  | -1.738389 | 0.483678  |
| C  | 7.040959  | -7.887275 | 0.182863  |
| C  | 5.846865  | -5.699102 | -0.694510 |
| C  | 4.654943  | -4.768202 | -0.675493 |
| C  | 4.023080  | -4.418620 | 0.526658  |
| H  | 4.374659  | -4.828007 | 1.465851  |
| C  | 2.948794  | -3.534270 | 0.534580  |
| H  | 2.466298  | -3.261099 | 1.466267  |
| C  | 2.483321  | -2.979258 | -0.663388 |
| C  | 3.107507  | -3.324741 | -1.867241 |
| H  | 2.750256  | -2.888271 | -2.793290 |
| C  | 4.181540  | -4.208669 | -1.871667 |
| H  | 4.660369  | -4.455764 | -2.811405 |
| C  | 1.359908  | -1.995932 | -0.647014 |
| B  | 7.872749  | -6.857405 | -2.237231 |
| H  | 8.392137  | -7.001941 | -3.295614 |
| B  | 6.109410  | -6.685212 | -2.097069 |
| H  | 5.326193  | -6.644033 | -2.984047 |
| B  | 6.894310  | -8.149931 | -1.500459 |

|    |           |           |           |
|----|-----------|-----------|-----------|
| H  | 6.722943  | -9.248424 | -1.911295 |
| B  | 8.450576  | -7.675060 | -0.769615 |
| H  | 9.320509  | -8.477030 | -0.695333 |
| B  | 8.628528  | -5.912465 | -0.913876 |
| H  | 9.685876  | -5.384131 | -1.031428 |
| B  | 7.175313  | -5.305028 | -1.732035 |
| H  | 7.097398  | -4.318880 | -2.384165 |
| B  | 5.599799  | -7.388061 | -0.561677 |
| H  | 4.542094  | -7.865283 | -0.336307 |
| B  | 8.115088  | -6.624922 | 0.631622  |
| H  | 8.743041  | -6.721217 | 1.632325  |
| B  | 7.323215  | -5.156922 | 0.036812  |
| H  | 7.332089  | -4.093190 | 0.558709  |
| B  | 6.362976  | -6.452606 | 0.754425  |
| H  | 5.778920  | -6.399120 | 1.779397  |
| Cu | -0.451838 | -0.163897 | -1.816209 |
| O  | -1.925202 | -1.371974 | 0.573431  |
| O  | 1.205064  | 1.006522  | 0.386188  |
| O  | -1.531341 | 1.376295  | 0.675668  |
| O  | -1.876154 | 1.172315  | -1.553880 |
| O  | 0.881485  | 1.268795  | -1.837190 |
| O  | -1.767514 | -1.599140 | -1.674438 |
| C  | -2.080466 | 1.716788  | -0.421105 |
| C  | -6.656496 | 8.427389  | -1.426823 |
| B  | -5.933011 | 9.003163  | 0.012057  |
| B  | -7.704116 | 8.851197  | -0.139072 |
| B  | -5.197711 | 7.709302  | -0.946881 |
| B  | -8.060281 | 7.464057  | -1.201488 |
| B  | -6.518043 | 6.766435  | -1.695492 |
| C  | -5.740604 | 6.238965  | -0.263740 |
| C  | -4.811367 | 5.046248  | -0.310342 |
| B  | -5.331171 | 7.542187  | 0.804843  |
| B  | -6.728234 | 6.487967  | 1.137544  |
| B  | -7.454111 | 5.997768  | -0.412535 |
| C  | -4.510843 | 4.405999  | -1.520949 |
| C  | -4.218264 | 4.568786  | 0.868015  |
| H  | -4.955525 | 4.751741  | -2.445708 |
| C  | -3.635703 | 3.325088  | -1.555999 |
| H  | -3.402715 | 2.836665  | -2.495479 |
| C  | -3.041453 | 2.859081  | -0.377822 |
| C  | -3.343244 | 3.487646  | 0.836225  |
| H  | -2.883451 | 3.125037  | 1.748841  |
| H  | -4.436055 | 5.047382  | 1.815277  |
| B  | -6.881414 | 8.247596  | 1.315634  |
| H  | -6.998043 | 8.766605  | 2.377775  |
| B  | -8.199263 | 7.293661  | 0.560532  |
| H  | -4.335626 | 7.460999  | 1.441314  |
| H  | -5.410286 | 10.067007 | 0.021783  |
| H  | -8.361989 | 9.833154  | -0.230956 |
| H  | -9.251845 | 7.135075  | 1.087629  |
| H  | -6.670315 | 5.695477  | 2.016258  |
| H  | -4.188728 | 7.795568  | -1.556900 |
| H  | -8.935514 | 7.514620  | -1.999133 |
| H  | -7.854932 | 4.895156  | -0.576291 |
| H  | -6.319926 | 6.319777  | -2.770170 |
| C  | 1.486327  | 1.515353  | -0.743822 |
| C  | 2.628257  | 2.476160  | -0.788878 |
| C  | 3.014520  | 3.063007  | -1.999109 |
| C  | 3.334205  | 2.786874  | 0.379447  |
| H  | 2.472005  | 2.815102  | -2.904605 |
| C  | 4.084626  | 3.950895  | -2.037891 |
| H  | 4.375997  | 4.388481  | -2.985007 |
| C  | 4.790934  | 4.274649  | -0.869902 |



|   |            |           |           |
|---|------------|-----------|-----------|
| C | 4.403947   | 3.675466  | 0.337493  |
| C | 5.963305   | 5.228191  | -0.932889 |
| H | 4.942457   | 3.893729  | 1.251674  |
| H | 3.040882   | 2.324557  | 1.314592  |
| B | 7.547346   | 4.608963  | -0.592409 |
| B | 7.076903   | 5.071581  | -2.247707 |
| B | 6.737679   | 5.722298  | 0.512593  |
| B | 5.966220   | 6.461451  | -2.152902 |
| B | 5.748053   | 6.856793  | -0.448684 |
| C | 7.302131   | 7.257520  | 0.102580  |
| B | 8.437980   | 5.969415  | 0.109384  |
| B | 8.513384   | 7.266626  | -1.111196 |
| B | 6.850842   | 7.817155  | -1.448453 |
| B | 8.657509   | 5.565629  | -1.607672 |
| H | 9.674309   | 5.101426  | -2.009476 |
| B | 7.674272   | 6.711344  | -2.575339 |
| H | 9.238879   | 5.902992  | 0.980608  |
| H | 7.648025   | 3.469188  | -0.285448 |
| H | 6.875975   | 4.218819  | -3.045433 |
| H | 7.991042   | 7.062034  | -3.665068 |
| H | 9.383912   | 8.068955  | -1.048429 |
| H | 6.350371   | 5.465262  | 1.598244  |
| H | 5.034462   | 6.559632  | -2.876732 |
| H | 6.609009   | 8.965988  | -1.611713 |
| H | 4.750531   | 7.251082  | 0.048147  |
| C | -2.284257  | -1.868289 | -0.540325 |
| C | -3.412789  | -2.846093 | -0.519988 |
| C | -4.011418  | -3.206527 | 0.693074  |
| C | -3.894599  | -3.398845 | -1.712127 |
| H | -3.640073  | -2.774595 | 1.615656  |
| C | -5.075398  | -4.102130 | 0.711386  |
| H | -5.533779  | -4.360805 | 1.658200  |
| C | -5.563851  | -4.660168 | -0.479390 |
| C | -4.959083  | -4.294947 | -1.690594 |
| C | -6.743349  | -5.606421 | -0.444925 |
| H | -5.324220  | -4.700276 | -2.626232 |
| H | -3.432907  | -3.116392 | -2.651633 |
| B | -8.237163  | -5.079959 | -1.152152 |
| B | -8.060596  | -5.232183 | 0.613759  |
| B | -7.272004  | -6.361494 | -1.888607 |
| B | -6.972615  | -6.600230 | 0.958171  |
| B | -6.477590  | -7.291784 | -0.586940 |
| C | -7.923268  | -7.806510 | -1.311201 |
| B | -9.019604  | -6.556264 | -1.739822 |
| B | -9.320996  | -7.614674 | -0.337254 |
| B | -7.748263  | -8.072566 | 0.368699  |
| B | -9.518354  | -5.854823 | -0.184569 |
| H | -10.580372 | -5.340194 | -0.049443 |
| B | -8.731608  | -6.794472 | 1.124308  |
| H | -9.661309  | -6.657630 | -2.731196 |
| H | -8.266865  | -4.015085 | -1.670394 |
| H | -7.984499  | -4.247345 | 1.268102  |
| H | -9.233130  | -6.948867 | 2.189962  |
| H | -10.181942 | -8.427280 | -0.401107 |
| H | -6.703986  | -6.297948 | -2.921863 |
| H | -6.176798  | -6.552615 | 1.833605  |
| H | -7.557078  | -9.170186 | 0.773333  |
| H | -5.417702  | -7.755761 | -0.829475 |
| H | 7.365478   | 7.985044  | 0.904359  |
| H | 6.981732   | -8.750382 | 0.836759  |
| H | -6.623955  | 9.067762  | -2.301373 |
| H | -7.863307  | -8.666756 | -1.968790 |
| H | -0.346854  | -0.439564 | 2.781258  |

|   |           |           |          |
|---|-----------|-----------|----------|
| B | 0.537358  | -0.246687 | 3.560218 |
| B | 1.427183  | 1.288011  | 3.622574 |
| B | 0.297669  | 0.846037  | 4.934480 |
| B | 2.255017  | -0.194603 | 3.096268 |
| B | 1.625649  | -1.544366 | 4.081619 |
| B | 0.410814  | -0.908979 | 5.217111 |
| C | 1.863764  | 1.442367  | 5.276033 |
| B | 3.061853  | 0.932768  | 4.189328 |
| H | 1.239501  | 2.255767  | 2.969356 |
| B | 1.241699  | 0.224660  | 6.315103 |
| H | -0.644754 | 1.536063  | 5.135276 |
| C | 3.074370  | -0.734431 | 4.501242 |
| H | 2.722920  | -0.398060 | 2.032630 |
| B | 2.064215  | -1.254081 | 5.786652 |
| H | 1.678622  | -2.646234 | 3.649326 |
| H | -0.519461 | -1.553613 | 5.575813 |
| B | 2.948356  | 0.276713  | 5.854606 |
| H | 4.029146  | 1.563115  | 3.931134 |
| H | 0.942140  | 0.502556  | 7.427343 |
| H | 4.015003  | -1.255196 | 4.359376 |
| H | 2.416130  | -2.146251 | 6.482786 |
| H | 3.848040  | 0.517316  | 6.583172 |
| H | 1.956150  | 2.445343  | 5.678032 |

\*\*\*\*\*

CuPhCB\_1CB\_1H2O

\*\*\*\*\*

173

scf done: -3808.242691

|    |           |           |           |
|----|-----------|-----------|-----------|
| Cu | -0.343712 | -0.199675 | 0.700979  |
| O  | 1.056526  | -1.483189 | -1.722421 |
| O  | 0.825409  | -1.760423 | 0.511409  |
| C  | 7.085111  | -7.858142 | 0.304294  |
| C  | 5.892164  | -5.675432 | -0.588836 |
| C  | 4.694454  | -4.751652 | -0.586399 |
| C  | 4.029190  | -4.423179 | 0.603569  |
| H  | 4.359455  | -4.842882 | 1.545991  |
| C  | 2.947630  | -3.547355 | 0.595314  |
| H  | 2.439280  | -3.289940 | 1.517714  |
| C  | 2.507966  | -2.980867 | -0.606838 |
| C  | 3.165370  | -3.305650 | -1.798629 |
| H  | 2.827538  | -2.859253 | -2.727294 |
| C  | 4.246526  | -4.180727 | -1.787065 |
| H  | 4.750147  | -4.412532 | -2.717728 |
| C  | 1.375378  | -2.006652 | -0.609730 |
| B  | 7.938578  | -6.828587 | -2.108181 |
| H  | 8.469926  | -6.972610 | -3.160736 |
| B  | 6.173365  | -6.662280 | -1.987027 |
| H  | 5.399093  | -6.624020 | -2.882000 |
| B  | 6.957217  | -8.123561 | -1.380138 |
| H  | 6.794227  | -9.223339 | -1.791132 |
| B  | 8.503922  | -7.642322 | -0.633414 |
| H  | 9.375885  | -8.441116 | -0.548674 |
| B  | 8.677153  | -5.879308 | -0.778082 |
| H  | 9.733861  | -5.347446 | -0.885335 |
| B  | 7.230664  | -5.278040 | -1.612100 |
| H  | 7.158229  | -4.293130 | -2.266553 |
| B  | 5.650257  | -7.365020 | -0.456075 |
| H  | 4.591944  | -7.845793 | -0.241238 |
| B  | 8.149702  | -6.591276 | 0.762770  |
| H  | 8.767322  | -6.684201 | 1.770250  |
| B  | 7.358942  | -5.126968 | 0.157757  |

|    |           |           |           |
|----|-----------|-----------|-----------|
| H  | 7.358785  | -4.062586 | 0.678366  |
| B  | 6.395737  | -6.425063 | 0.866628  |
| H  | 5.801512  | -6.372182 | 1.885769  |
| Cu | -0.430174 | -0.181587 | -1.874718 |
| O  | -1.934042 | -1.373616 | 0.585900  |
| O  | 1.220518  | 0.978473  | 0.398037  |
| O  | -1.512999 | 1.374508  | 0.712074  |
| O  | -1.897967 | 1.167361  | -1.505479 |
| O  | 0.884785  | 1.275656  | -1.819076 |
| O  | -1.765319 | -1.638982 | -1.654149 |
| C  | -2.077197 | 1.719918  | -0.374150 |
| C  | -6.587592 | 8.493969  | -1.279704 |
| B  | -5.846653 | 9.052452  | 0.156903  |
| B  | -7.620229 | 8.917313  | 0.020176  |
| B  | -5.130746 | 7.759655  | -0.817855 |
| B  | -7.997997 | 7.541227  | -1.049343 |
| B  | -6.466249 | 6.834442  | -1.561838 |
| C  | -5.680957 | 6.289226  | -0.141224 |
| C  | -4.764544 | 5.087590  | -0.206488 |
| B  | -5.250771 | 7.580479  | 0.933900  |
| B  | -6.654140 | 6.535951  | 1.270665  |
| B  | -7.397489 | 6.064005  | -0.276672 |
| C  | -4.483841 | 4.454490  | -1.425463 |
| C  | -4.164646 | 4.592295  | 0.960897  |
| H  | -4.932597 | 4.814192  | -2.342884 |
| C  | -3.623372 | 3.362902  | -1.477064 |
| H  | -3.406773 | 2.882150  | -2.424197 |
| C  | -3.022622 | 2.876649  | -0.311002 |
| C  | -3.303743 | 3.500116  | 0.910615  |
| H  | -2.838647 | 3.123929  | 1.815008  |
| H  | -4.366268 | 5.065505  | 1.914499  |
| B  | -6.790725 | 8.295618  | 1.463104  |
| H  | -6.893575 | 8.807532  | 2.530040  |
| B  | -8.123312 | 7.358774  | 0.712346  |
| H  | -4.250554 | 7.485170  | 1.560988  |
| H  | -5.314675 | 10.111626 | 0.169940  |
| H  | -8.270107 | 9.905658  | -0.058778 |
| H  | -9.172650 | 7.205191  | 1.247276  |
| H  | -6.595285 | 5.736009  | 2.142529  |
| H  | -4.126451 | 7.841670  | -1.436128 |
| H  | -8.879414 | 7.605276  | -1.839178 |
| H  | -7.809126 | 4.966085  | -0.445441 |
| H  | -6.281877 | 6.394601  | -2.641822 |
| C  | 1.497278  | 1.500315  | -0.727431 |
| C  | 2.647860  | 2.452526  | -0.765777 |
| C  | 3.051628  | 3.026645  | -1.976319 |
| C  | 3.344862  | 2.765734  | 0.407035  |
| H  | 2.516879  | 2.774292  | -2.885266 |
| C  | 4.129747  | 3.905062  | -2.010950 |
| H  | 4.434849  | 4.332442  | -2.958459 |
| C  | 4.826658  | 4.232035  | -0.838211 |
| C  | 4.422233  | 3.645465  | 0.369614  |
| C  | 6.006664  | 5.176520  | -0.896408 |
| H  | 4.952899  | 3.866391  | 1.287765  |
| H  | 3.038584  | 2.312082  | 1.342271  |
| B  | 7.585021  | 4.547999  | -0.546196 |
| B  | 7.126733  | 5.010272  | -2.204901 |
| B  | 6.776487  | 5.668608  | 0.552151  |
| B  | 6.024396  | 6.407343  | -2.118797 |
| B  | 5.799524  | 6.807372  | -0.416595 |
| C  | 7.353073  | 7.199403  | 0.142400  |
| B  | 8.480632  | 5.904062  | 0.157875  |
| B  | 8.570859  | 7.198630  | -1.064680 |

|   |            |           |           |
|---|------------|-----------|-----------|
| B | 6.913804   | 7.758899  | -1.412047 |
| B | 8.706830   | 5.495865  | -1.557145 |
| H | 9.722917   | 5.024563  | -1.952569 |
| B | 7.736220   | 6.645758  | -2.532218 |
| H | 9.276345   | 5.834320  | 1.033617  |
| H | 7.677298   | 3.408260  | -0.236575 |
| H | 6.925603   | 4.157438  | -3.002415 |
| H | 8.061209   | 6.992451  | -3.620867 |
| H | 9.446154   | 7.995565  | -0.998699 |
| H | 6.382238   | 5.416375  | 1.636395  |
| H | 5.097081   | 6.509714  | -2.847770 |
| H | 6.680234   | 8.909006  | -1.578792 |
| H | 4.801929   | 7.209179  | 0.074067  |
| C | -2.289392  | -1.886984 | -0.518888 |
| C | -3.425949  | -2.857940 | -0.484650 |
| C | -4.073859  | -3.142725 | 0.723192  |
| C | -3.865604  | -3.482165 | -1.657240 |
| H | -3.731924  | -2.660974 | 1.632360  |
| C | -5.146748  | -4.027686 | 0.753597  |
| H | -5.639934  | -4.229716 | 1.696775  |
| C | -5.596802  | -4.650834 | -0.419899 |
| C | -4.938223  | -4.368036 | -1.624932 |
| C | -6.783160  | -5.587875 | -0.373735 |
| H | -5.264696  | -4.833059 | -2.546917 |
| H | -3.360263  | -3.269294 | -2.592611 |
| B | -8.280963  | -5.065458 | -1.077426 |
| B | -8.096038  | -5.203808 | 0.688109  |
| B | -7.321350  | -6.353670 | -1.808240 |
| B | -7.005417  | -6.568260 | 1.039281  |
| B | -6.520149  | -7.273977 | -0.503215 |
| C | -7.969498  | -7.793817 | -1.215145 |
| B | -9.067861  | -6.546774 | -1.648213 |
| B | -9.361674  | -7.593411 | -0.235222 |
| B | -7.785411  | -8.046108 | 0.466369  |
| B | -9.557475  | -5.832344 | -0.096669 |
| H | -10.618276 | -5.315725 | 0.040299  |
| B | -8.763967  | -6.761300 | 1.216117  |
| H | -9.714659  | -6.656119 | -2.635426 |
| H | -8.313407  | -4.005041 | -1.604831 |
| H | -8.021218  | -4.213332 | 1.333754  |
| H | -9.260112  | -6.905842 | 2.285612  |
| H | -10.223464 | -8.405882 | -0.287767 |
| H | -6.762430  | -6.298767 | -2.846909 |
| H | -6.202645  | -6.508004 | 1.907766  |
| H | -7.592570  | -9.140524 | 0.878661  |
| H | -5.461615  | -7.739805 | -0.748078 |
| H | 7.416631   | 7.928004  | 0.943178  |
| H | 7.021988   | -8.720567 | 0.958722  |
| H | -6.557006  | 9.140747  | -2.149607 |
| H | -7.913457  | -8.659677 | -1.865663 |
| H | -0.356572  | -0.467101 | 2.814276  |
| B | 0.526777   | -0.268530 | 3.591051  |
| B | 1.418252   | 1.266209  | 3.635912  |
| B | 0.295194   | 0.837215  | 4.957009  |
| B | 2.243329   | -0.221188 | 3.119659  |
| B | 1.618255   | -1.560894 | 4.120664  |
| B | 0.409154   | -0.914700 | 5.255693  |
| C | 1.863119   | 1.436326  | 5.286039  |
| B | 3.055577   | 0.916188  | 4.198348  |
| H | 1.228067   | 2.228557  | 2.975434  |
| B | 1.245572   | 0.228836  | 6.339271  |
| H | -0.645675  | 1.529971  | 5.156742  |
| C | 3.069311   | -0.747647 | 4.526186  |

|   |           |           |           |
|---|-----------|-----------|-----------|
| H | 2.707221  | -0.434902 | 2.056491  |
| B | 2.065167  | -1.254810 | 5.820894  |
| H | 1.669706  | -2.667278 | 3.699608  |
| H | -0.519189 | -1.555792 | 5.626079  |
| B | 2.950144  | 0.276144  | 5.870389  |
| H | 4.021813  | 1.543990  | 3.929804  |
| H | 0.951373  | 0.517371  | 7.450371  |
| H | 4.009058  | -1.270094 | 4.384656  |
| H | 2.420118  | -2.140499 | 6.523930  |
| H | 3.853198  | 0.523405  | 6.592681  |
| H | 1.957647  | 2.443041  | 5.678045  |
| O | -1.207700 | -0.075096 | -3.992415 |
| H | -1.752100 | 0.721150  | -3.860155 |
| H | -1.835096 | -0.814036 | -3.899085 |

\*\*\*\*\*

# CuPhCB\_2H2O

\*\*\*\*\*

152

scf done: -3552.510467

|    |           |           |           |
|----|-----------|-----------|-----------|
| Cu | -0.094253 | -0.163531 | 1.307433  |
| O  | 1.394110  | -1.476976 | -1.104162 |
| O  | 1.133341  | -1.741650 | 1.125406  |
| C  | 7.321860  | -7.949954 | 0.880413  |
| C  | 6.147758  | -5.753999 | -0.003754 |
| C  | 4.963912  | -4.812742 | 0.010338  |
| C  | 4.316379  | -4.472547 | 1.206512  |
| H  | 4.649450  | -4.896187 | 2.146051  |
| C  | 3.251847  | -3.575956 | 1.207622  |
| H  | 2.761675  | -3.310177 | 2.137421  |
| C  | 2.810815  | -2.996989 | 0.012721  |
| C  | 3.450849  | -3.336137 | -1.185304 |
| H  | 3.113935  | -2.882563 | -2.110640 |
| C  | 4.513718  | -4.233128 | -1.185174 |
| H  | 5.002957  | -4.474066 | -2.121161 |
| C  | 1.694562  | -2.001719 | 0.012587  |
| B  | 8.161184  | -6.937083 | -1.544316 |
| H  | 8.678080  | -7.090495 | -2.602694 |
| B  | 6.399637  | -6.747289 | -1.402986 |
| H  | 5.615064  | -6.700182 | -2.288667 |
| B  | 7.171096  | -8.217435 | -0.801921 |
| H  | 6.988628  | -9.315879 | -1.208329 |
| B  | 8.732483  | -7.754947 | -0.074069 |
| H  | 9.594585  | -8.565169 | 0.002436  |
| B  | 8.927318  | -5.994586 | -0.225008 |
| H  | 9.989558  | -5.477032 | -0.345812 |
| B  | 7.479501  | -5.376421 | -1.043554 |
| H  | 7.412285  | -4.392120 | -1.699407 |
| B  | 5.885276  | -7.439726 | 0.135625  |
| H  | 4.823195  | -7.906213 | 0.363704  |
| B  | 8.408707  | -6.696241 | 1.323536  |
| H  | 9.036538  | -6.795378 | 2.323965  |
| B  | 7.630426  | -5.222525 | 0.724281  |
| H  | 7.649839  | -4.157269 | 1.242209  |
| B  | 6.658623  | -6.506387 | 1.447655  |
| H  | 6.076685  | -6.443296 | 2.473296  |
| Cu | -0.072261 | -0.175150 | -1.280728 |
| O  | -1.667807 | -1.391767 | 1.120731  |
| O  | 1.466236  | 1.023625  | 1.139787  |
| O  | -1.303720 | 1.387676  | 1.124608  |
| O  | -1.566291 | 1.144233  | -1.107307 |
| O  | 1.216721  | 1.303272  | -1.092238 |

|   |           |           |           |
|---|-----------|-----------|-----------|
| O | -1.420786 | -1.657673 | -1.108307 |
| C | -1.815155 | 1.707387  | 0.007464  |
| C | -6.338397 | 8.465844  | -1.060848 |
| B | -5.934681 | 8.880000  | 0.547262  |
| B | -7.634149 | 8.696098  | 0.035995  |
| B | -4.960303 | 7.737351  | -0.391367 |
| B | -7.705941 | 7.442554  | -1.230259 |
| B | -6.061827 | 6.857171  | -1.487893 |
| C | -5.548198 | 6.177406  | -0.002669 |
| C | -4.587515 | 5.009329  | -0.008600 |
| B | -5.418501 | 7.351820  | 1.267135  |
| B | -6.794132 | 6.221820  | 1.197873  |
| B | -7.185912 | 5.908957  | -0.512303 |
| C | -4.198613 | 4.395882  | -1.207854 |
| C | -4.074650 | 4.510385  | 1.197949  |
| H | -4.590348 | 4.750177  | -2.153281 |
| C | -3.309132 | 3.326246  | -1.202325 |
| H | -3.009398 | 2.859714  | -2.133837 |
| C | -2.787608 | 2.843324  | 0.002830  |
| C | -3.181818 | 3.443244  | 1.204635  |
| H | -2.780036 | 3.067471  | 2.139046  |
| H | -4.373012 | 4.957999  | 2.138366  |
| B | -7.073222 | 7.941173  | 1.543677  |
| H | -7.417025 | 8.321386  | 2.615207  |
| B | -8.170017 | 7.049385  | 0.439970  |
| H | -4.561900 | 7.235127  | 2.075992  |
| H | -5.480344 | 9.949056  | 0.783119  |
| H | -8.312822 | 9.662395  | -0.068975 |
| H | -9.294373 | 6.796033  | 0.727526  |
| H | -6.850467 | 5.326079  | 1.971786  |
| H | -3.859848 | 7.928846  | -0.778180 |
| H | -8.414430 | 7.566158  | -2.172427 |
| H | -7.487201 | 4.823268  | -0.878588 |
| H | -5.632051 | 6.555591  | -2.545556 |
| C | 1.768185  | 1.557094  | 0.025248  |
| C | 2.869146  | 2.567670  | 0.028968  |
| C | 3.322849  | 3.123396  | -1.172885 |
| C | 3.462483  | 2.963638  | 1.232909  |
| H | 2.862558  | 2.815087  | -2.104958 |
| C | 4.354376  | 4.056569  | -1.169306 |
| H | 4.694950  | 4.473533  | -2.109444 |
| C | 4.956291  | 4.455958  | 0.033408  |
| C | 4.494366  | 3.897583  | 1.233789  |
| C | 6.088544  | 5.459200  | 0.015875  |
| H | 4.941241  | 4.185625  | 2.177329  |
| H | 3.109694  | 2.532178  | 2.163061  |
| B | 7.703893  | 4.906359  | 0.331440  |
| B | 7.211464  | 5.419165  | -1.300384 |
| B | 6.838712  | 5.924273  | 1.483297  |
| B | 6.027545  | 6.742011  | -1.149349 |
| B | 5.791638  | 7.050095  | 0.572092  |
| C | 7.321765  | 7.505119  | 1.142669  |
| B | 8.522651  | 6.278922  | 1.094813  |
| B | 8.530931  | 7.632516  | -0.065296 |
| B | 6.841285  | 8.109373  | -0.382670 |
| B | 8.763587  | 5.964520  | -0.637097 |
| H | 9.802596  | 5.571733  | -1.057999 |
| B | 7.722241  | 7.100693  | -1.555641 |
| H | 9.325414  | 6.215763  | 1.964604  |
| H | 7.865064  | 3.761031  | 0.587605  |
| H | 7.065315  | 4.594803  | -2.138591 |
| H | 8.020862  | 7.514785  | -2.628245 |
| H | 9.358852  | 8.475222  | 0.035543  |

|   |            |           |           |
|---|------------|-----------|-----------|
| H | 6.471109   | 5.599260  | 2.557059  |
| H | 5.089560   | 6.813843  | -1.868844 |
| H | 6.540649   | 9.250672  | -0.493821 |
| H | 4.775218   | 7.370067  | 1.084010  |
| C | -1.985952  | -1.906523 | 0.002617  |
| C | -3.125789  | -2.876286 | -0.004809 |
| C | -3.856995  | -3.118253 | 1.163866  |
| C | -3.488713  | -3.541109 | -1.181425 |
| H | -3.580914  | -2.602781 | 2.076715  |
| C | -4.933611  | -3.998371 | 1.153514  |
| H | -5.489882  | -4.166146 | 2.067811  |
| C | -5.307600  | -4.660141 | -0.025520 |
| C | -4.565483  | -4.423112 | -1.191158 |
| C | -6.499150  | -5.591585 | -0.023504 |
| H | -4.829265  | -4.921646 | -2.115779 |
| H | -2.920805  | -3.361046 | -2.087328 |
| B | -7.974761  | -5.064328 | -0.770980 |
| B | -7.844181  | -5.209283 | 0.998286  |
| B | -6.994605  | -6.351132 | -1.476679 |
| B | -6.765116  | -6.575193 | 1.379087  |
| B | -6.234558  | -7.277060 | -0.150877 |
| C | -7.661797  | -7.792533 | -0.907929 |
| B | -8.745476  | -6.542707 | -1.369795 |
| B | -9.082635  | -7.594293 | 0.030337  |
| B | -7.528783  | -8.050693 | 0.778160  |
| B | -9.281304  | -5.833273 | 0.168800  |
| H | -10.344942 | -5.315730 | 0.276005  |
| B | -8.528055  | -6.767392 | 1.502127  |
| H | -9.362078  | -6.648290 | -2.376438 |
| H | -7.990022  | -4.002020 | -1.295201 |
| H | -7.792748  | -4.220996 | 1.649255  |
| H | -9.056406  | -6.914466 | 2.555688  |
| H | -9.943039  | -8.405717 | -0.050934 |
| H | -6.404616  | -6.290672 | -2.497761 |
| H | -5.987455  | -6.514190 | 2.270455  |
| H | -7.349437  | -9.146713 | 1.192181  |
| H | -5.169176  | -7.742704 | -0.364800 |
| H | 7.347808   | 8.198620  | 1.976012  |
| H | 7.255171   | -8.810064 | 1.537531  |
| H | -6.172627  | 9.210202  | -1.831920 |
| H | -7.587088  | -8.656501 | -1.559113 |
| O | -0.671111  | -0.209270 | -3.466945 |
| H | -1.270249  | 0.556427  | -3.416999 |
| H | -1.260261  | -0.980203 | -3.385551 |
| O | -0.157880  | -0.770478 | 3.488042  |
| H | -0.971028  | -1.301559 | 3.420423  |
| H | 0.561815   | -1.423300 | 3.426274  |

## References

<sup>1</sup> Irikura, K. K.; Johnson, R. D.; Kacker, R. N., *The Journal of Physical Chemistry A* **2005**, *109*, 8430-8437.
